# Supplementary material for: Mapping Whole-Transcriptome Splicing in Mouse Hematopoietic Stem Cells
Source: PubMed Central journal article supplement — Stem Cell Reports. 2016 Dec 29;8(1):163–76. doi: 10.1016/j.stemcr.2016.12.002 (PMC5233452; doi:10.1016/j.stemcr.2016.12.002), 2016-12-29
Supplement: mmc3.pdf [file mmc3.pdf]

## Mapping Whole-Transcriptome Splicing in Mouse Hematopoietic Stem Cells

Oron Goldstein,<sup>1,2</sup> Karin Meyer,<sup>1</sup> Yariv Greenshpan,<sup>1,2</sup> Nir Bujanover,<sup>1,2</sup> Mili Feigin,<sup>1</sup> Hadas Ner-Gaon,<sup>3</sup> Tal Shay,<sup>3</sup> and Roi Gazit<sup>1,2,4,\*</sup><sup>1</sup>The Shraga Segal Department for Microbiology, Immunology and Genetics, Faculty of Health Science<sup>2</sup>The National Institute for Biotechnology in the Negev<sup>3</sup>Department of Life Sciences<sup>4</sup>Regenerative Medicine and Stem Cell (RMSC) Research Center

Ben-Gurion University of the Negev, Be'er Sheva 84105, Israel

\*Correspondence: [gazitroi@bgu.ac.il](mailto:gazitroi@bgu.ac.il)<http://dx.doi.org/10.1016/j.stemcr.2016.12.002>

## SUMMARY

Hematopoietic stem cells (HSCs) are rare cells that generate all the various types of blood and immune cells. High-quality transcriptome data have enabled the identification of significant genes for HSCs. However, most genes are expressed in various forms by alternative splicing (AS), extending transcriptome complexity. Here, we delineate AS to determine which isoforms are expressed in mouse HSCs. Our analysis of microarray and RNA-sequencing data includes differential expression of splicing factors that may regulate AS, and a complete map of splicing isoforms. Multiple types of isoforms for known HSC genes and unannotated splicing that may alter gene function are presented. Transcriptome-wide identification of genes and their respective isoforms in mouse HSCs will open another dimension for adult stem cells.

## INTRODUCTION

Hematopoietic stem cells (HSCs) are a rare subset of cells that possess the abilities of self-renewal and multipotency (Bryder et al., 2006; Gazit et al., 2008). By virtue of these attributes, HSCs can regenerate blood and immune cells throughout life. Prospective isolation of HSCs using defined surface markers enables advanced research (Kiel et al., 2005; Osawa et al., 1996; Spangrude et al., 1988). However, our understanding of adult stem cells is incomplete, as is our ability to utilize them clinically. HSCs enable bone marrow transplantation, as they can naturally reconstitute the blood and immune systems of recipients, thus, saving tens of thousands of patients every year (Copelan, 2006; Thomas, 2005). Nevertheless, their transplantation is still limited because of the need to have a matched donor, without manipulation of the cells, further attesting to our incomplete understanding. Better knowledge of HSCs is essential for the field of adult stem cell research and to extend the application of HSCs in regenerative medicine beyond current practice.

The scientific understanding of stem cell functions advanced with molecular biology (Orkin and Zon, 2008; Rossi et al., 2012). Genetic studies have made seminal discoveries, finding the mutations in genes that are associated with hematopoietic diseases (Rosenbauer and Tenen, 2007). Such mutated genes revealed developmental, immune, and cellular processes. The development of microarray techniques has enabled the quantification of whole transcriptomes, revealing the expression of virtually all genes in their respective tissues. Transcriptome data obtained from highly purified HSCs made it possible to

identify HSC-specific genes and map networks of genes (Gazit et al., 2013). We used transcriptome data to identify HSC genes that are capable of direct reprogramming blood cells into an induced HSC state (Riddell et al., 2014). However, most of the genes are transcribed into several mature mRNA by alternative splicing (AS), whereas microarray analysis is typically performed at the coarse level describing genes as discrete units. We bypassed this problem by cloning HSC factors for reprogramming directly from the cDNA of HSC (Riddell et al., 2014) but noted that the data lacked the resolution of isoform expression of each gene. High-resolution mapping of the expression of isoforms throughout the HSC transcriptome is needed for better understanding of the specific genes of interest. Fortunately, the emerging technique of RNA-sequencing (RNA-seq) can potentially identify and quantify all of the expressed isoforms simultaneously. Nevertheless, delineating the data into a complete AS map remains a challenge.

The splicing process increases transcriptome complexity: instead of having only one product per gene, there can be multiple distinguishable isoforms. Indeed, of 25,000 protein-coding genes, there are at least 10-fold more isoforms (Nilsen and Graveley, 2010). Isoforms include alternative splice-donor and/or splice-acceptor sites that change the length of each exon, or the inclusion/exclusion of an exon. If such an exon encodes for an activation domain, the isoform might invert the gene's function as the activation-deficient protein keeps its interaction and becomes an inhibitor. Knowing which isoforms are expressed is of paramount importance, since different tissues may express different isoforms of the same gene. Splicing had been recently mapped in human HSCs (Sun et al., 2014),

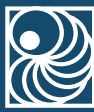

suggesting significant roles for the maintenance and differentiation of stem cells. Hence, a map of the whole-transcriptome splicing of mouse HSCs is necessary to provide high-resolution data for future studies of these cells and advance the field of adult stem cell research.

Following the identification of embryonic stem cell (ESC)-specific AS (Gabut et al., 2011), their regulation had been studied, leading to the identification of muscle-blind-like proteins as general negative regulators of stem cell-specific splicing in human cells (Han et al., 2013). Recently, unique AS in pluripotent stem cells has been discovered to be conserved in worms just as in humans (Solana et al., 2016), highlighting its fundamental role. These pioneering studies increased the interest in studying AS and regulation of ESCs, and reprogramming (Aaronson and Meshorer, 2013). Importantly, AS is implicated in many diseases after specific mutations that do not affect the coding sequence were discovered to cause aberrant splicing that can frequently disrupt gene function (Xiong et al., 2015). Clinical interest in aberrant splicing aided the discovery of mutations in splicing factors that drive hematopoietic malignancies (Steensma, 2012). This unstudied dimension of transcriptome complexity is yet to be studied in somatic stem cells.

In this study, we sought to capture the whole AS landscape of mouse HSCs. Obtaining data from extensive microarrays that cover much of the immune system was initially preferred, mainly because of the potential to undertake comparisons between cell types. RNA-seq data of highly purified HSCs were analyzed as they enable identification of both known and unknown transcripts. Microarray data were analyzed using exon ratios and RNA-seq data were analyzed by the direct observation of splice junctions. Independent validation using qRT-PCR encountered a striking preference for the RNA-seq data. Nevertheless, microarray data can still provide valuable information regarding the expression of splice factors across the hematopoietic system. RNA-seq revealed AS in all types of annotated genes, with some preference for genes involved in transcription; genes that are preferentially expressed in HSCs show extensive AS, with most having two or more isoforms. We refer to “canonical” and “variant” isoforms according to RefSeq. Some HSC genes mostly express the canonical isoform, others predominantly express variant isoforms with a potential different gene function in HSCs. Unannotated splicing was observed, resulting in isoforms not reported previously. By uploading our analyzed data on a custom track of the University of California Santa Cruz (UCSC) genome browser, we provide many scientists with the actual splicing of their genes of interest in HSCs. This study presents the comprehensive mapping of whole-transcriptome splicing in adult mouse HSCs.

## RESULTS

### Microarrays and RNA-Seq Data for Splicing Analysis

Whole-transcriptome expression data of HSCs are available from extensive microarrays and from RNA-seq; the former provides well-established coverage of known genes in many cell types, while the latter can reveal both known and unknown genes. We analyzed Immunological Genome Project (ImmGen) consortium microarrays (Shay and Kang, 2013) and RNA-seq datasets that were obtained from several independent publications (Cabezas-Wallscheid et al., 2014; Qian et al., 2016; Sun et al., 2014; Venkatraman et al., 2013). The raw data output parameters (Figure 1A) suggest that the main advantage of using microarray data is that they cover many cell types (about 249): HSCs through progenitors and down to effector cells (Shay and Kang, 2013). On the other hand, RNA-seq data offer detection of all transcripts, including knowns and unknowns.

To confirm the comparability of gene expression levels between microarray and RNA-seq, we calculated the correlation, which is high ( $r = 0.742 \pm 0.019$ ), suggesting a fairly good agreement between the two methods. Surprisingly, however, plotting the expression values, as shown in Figure 1B, indicates that there are numerous genes that “fall off” the diagonal and are substantially different between the RNA-seq and the microarray data. The ImmGen data were generated from male mice only (in order to minimize variability in this consortium dataset), while the RNA-seq data were generated from both males and females (Cabezas-Wallscheid et al., 2014; Qian et al., 2016; Sun et al., 2014; Venkatraman et al., 2013). Hence, at least some of the differences between the two datasets can be attributed to the animals’ gender. Nevertheless, we find good correlative expression data across the transcriptome when analyzing genes as discrete units. Given that different cell types mostly vary in their transcriptomes, it is expected that their AS pattern will also differ. In Figure 1C we show a heatmap for the varying expression intensities of 216 splicing factors (Table S3) across the hematopoietic system and, indeed, a clear difference between cell types/groups is evident.

### AS Analysis of Microarray Data

Following the good correlation between the datasets with respect to gene expression, we first analyzed the data for splicing using the microarray dataset, which provided broad coverage of many cell types. ImmGen’s data were produced using Affymetrix ST 1.0 arrays, which were not originally designed to detect AS. Nevertheless, these arrays contain multiple probe sets per gene, and a previous study (Ergun et al., 2013) succeeded in retrieving splicing data.

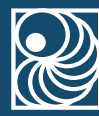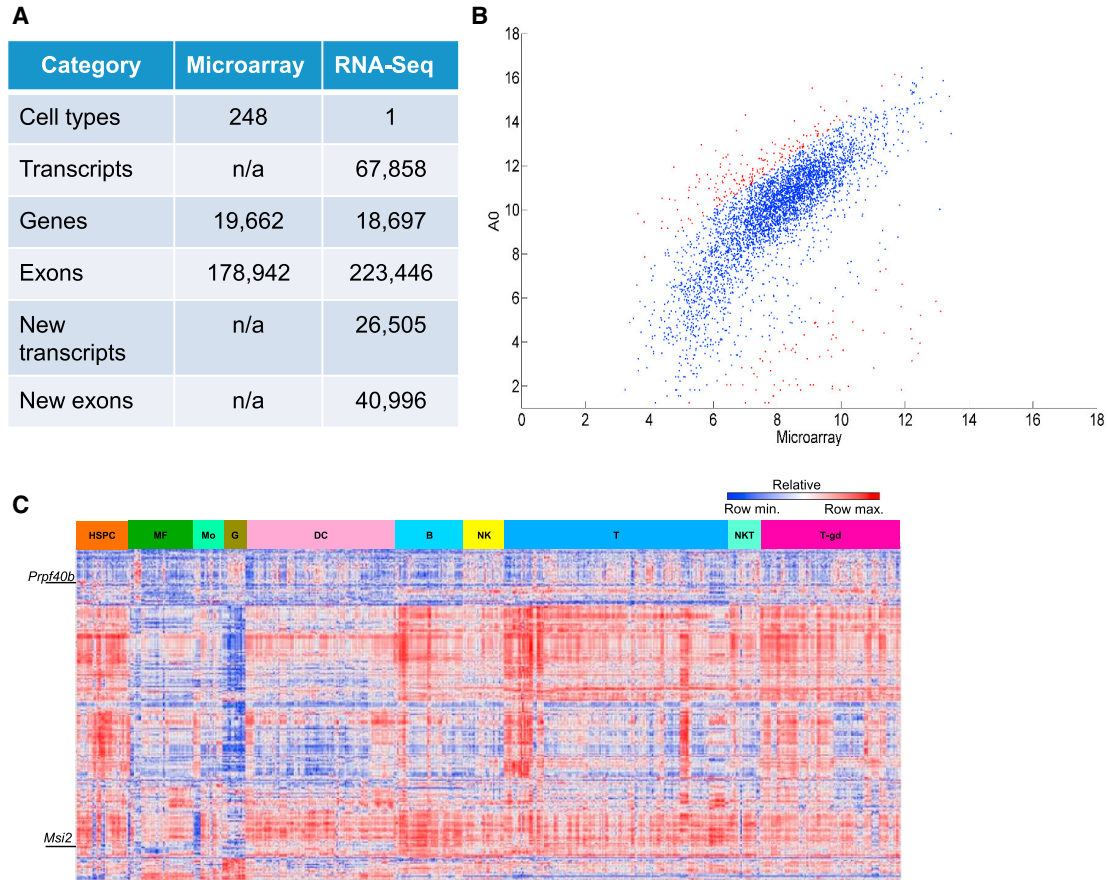

**Figure 1. Microarrays and RNA-Seq Data for Splicing in Mouse HSCs**

(A) A comparison between the raw data gathered from ImmGen's microarrays and the combined results of ten RNA-seq samples (see Table S1 for details). n/a, not applicable.

(B) Gene expression correlation between a representative RNA-seq (sample A0) and the corresponding ImmGen microarray data in HSCs. A correlation for the log<sub>2</sub> expression values of RNA-seq and ImmGen's microarrays for HSCs, both determined by their respective cell markers. Blue and red dots represent expression values having a fold-change of <4 or >4, respectively.

(C) Heatmap of splicing factor expression across hematopoietic cell types (detailed in Table S3). Relative expression value is shown on a scale of low (blue) to high (red).

We hypothesized that we may identify exons that are either over- or underexpressed in HSCs. In brief, levels of exon expression in HSCs were compared with either all other cells, or with the “progenitors” group (Figure S1A). The seven candidate genes identified that might have exon-skipping isoforms in HSCs (Figure S1B) were validated using qRT-PCR. However, we found lack of any correlation with these predictions (Figure S1C). Despite this setback, we realized that, while microarrays might not be ideal for AS detection in HSCs using our method, the ImmGen data can provide information about splicing factors (Figure 1C); which ones are more active, or even unique, to HSCs and their close progeny. Indeed, *Msi2*, which plays an essential role in HSCs and in leukemia (de Andres-Aguayo et al., 2012; Kharas et al., 2010), showed preferential expression in HSCs. Our analysis finds a clear

differential expression of splicing factors across the immune system (Figure 1C), suggesting there is room for further utilization of the ImmGen data for studies of splicing in immune cells.

### AS Analysis of RNA-Seq

RNA-seq analysis for gene expression is established, but the analysis for splicing is not trivial yet (Hooper, 2014). We obtained the raw data for the RNA-seq of HSCs from four published studies (Cabezas-Wallscheid et al., 2014; Qian et al., 2016; Sun et al., 2014; Venkatraman et al., 2013); the file names and links are given in Table S1. The analysis included a bioinformatic pipeline using TopHat for read alignment, Cufflinks for read assembly into transcripts to determine the availability, reliability, and ability to identify previously unseen splicing (see Experimental Procedures



for details). This process yielded a plethora of output data for further analysis and interpretation. Unlike microarrays, sequencing also contains reads that span exon-exon junctions (junction-spanning reads, or junction reads). Such junction reads provide direct evidence for the presence of spliced RNA. Visualization using the Integrative Genomics Viewer (IGV) (Robinson et al., 2011) highlights junction reads, enabling easy manual identification of splicing events. Importantly, our analysis is not limited to known transcripts but rather allows the discovery of unannotated genes and splicing events. We also generated tracks for the UCSC browser to enable online accessibility to any researcher to study their gene(s) of interest (see below). Some isoforms appear only in one or a few samples, which is to be expected since there are slight differences in sorting schemes and sequencing depth between the samples.

### Splicing Is Common in Various Types of Genes

Equipped with global splicing data, we sought to focus on specific types of genes for further analysis. We used major gene ontology (GO) categories to dissect the transcriptome into subsets of biological relevance. As shown in Figure 2, the various types of genes all presented abundant splicing, with the average number of variants ranging between 4 and 5.7 isoforms per gene. Although some categories had fewer variants, such as “oxidoreductase” with only 4.06 variants per gene, and other categories had more variations, such as “transcription” with 5.72, it is evident that splicing is abundant. Averages may blur specific differences, so we plotted the actual distribution of splice variants for each gene category against the distribution in all genes, finding prominent deviations (Figures 2B–2D and S2), which are statistically significant ( $p$  values all below 0.001 by chi-square test). Clearly, each group of genes presents some deviations, usually on the numbers of genes with three to six expressed variants. We conclude that splicing is not limited to specific types of genes, but is common to all, with a preference for the gene group involved in transcription to have more isoforms expressed.

### HSC Genes Reveal Multiple Splicing Forms

We focused next on a previously defined list of genes that are preferentially expressed in HSCs (Gazit et al., 2013), including key regulators, reprogramming factors (Riddell et al., 2014), and highly specific HSC genes (Gazit et al., 2014). Surprisingly, 248 of the 322 HSC genes captured by RNA-seq were found to have more than one isoform (range 2–22 isoforms, multiple AS types), while only 32 genes had a single isoform (and 43 genes were below the threshold). This finding highlights the need to recognize AS expression in order to better understand HSCs, as each isoform may change the function of a gene. To indepen-

dently validate these results we sorted HSCs (Lineage<sup>-</sup> cKit<sup>+</sup>Sca1<sup>+</sup>CD34<sup>-</sup> flk2<sup>-</sup>) and performed qRT-PCR for 12 genes, including *HoxA9*, *Meis1*, *Prdm16*, *Pbx1*, *Hlf*, *Nadk2*, and *CDKn1c* (*p57*), which are presented below. We focused on transcription factors as they had the highest average splicing (Figure 2) and are of interest as cell-identity determinants. We found that the qPCR data were in good agreement with the RNA-seq data, supporting the validity of our analysis for AS in HSCs.

### *HoxA9* Expresses a Minor Retained-Intron Isoform in HSCs

Homeobox A9 (*HoxA9*) encodes for a DNA-binding protein that regulates morphogenesis, differentiation, and normal and malignant hematopoiesis (Collins and Hess, 2015; Fujimoto et al., 1998). We have previously identified it as having preferential expression in normal mouse HSCs (Gazit et al., 2013), but referred to *HoxA9* as a discrete gene without consideration of AS (Riddell et al., 2014). This is a striking paradox, especially considering published data about *HoxA9* AS in leukemia (Collins and Hess, 2015) and the possibility that such an isoform is expressed within normal HSCs. Indeed *HoxA9* expresses two main transcripts in HSCs (Figure 3A): the canonical isoform (NM\_010456) having two exons is the more studied, and the variant isoform of three exons, which excises an intron out of the first exon (NM\_001277238). To better represent the relative expression of both isoforms, we have generated a Sashimi plot in which each splice junction is illustrated and reads are enumerated conveniently (Figure 3B). *HoxA9* shows 13%  $\pm$  5% junction-spanning reads across the retained intron (Figure 3B). Independent qRT-PCR using isoform-specific primers (Figures S3A and S3B) found expression of both isoforms, with a predominance of the canonical isoform in agreement with the RNA-seq data (Figure 3C). The *HoxA9* variant was discovered a while ago and named *HoxA9T* (Fujimoto et al., 1998). Our RNA-seq analysis and qRT-PCR validation show that the well-studied *HoxA9* gene has substantial AS within HSCs, and the *HoxA9T* variant, which was previously related to leukemia (Collins and Hess, 2015), is expressed in normal mouse HSCs.

### *Meis1* Exon-Skipping Variant Is Minor

Meis-homeobox 1 (*Meis1*) is a major transcription factor in HSCs and leukemia. Using IGV visualization, we noted the possible presence of multiple AS events. Since *Meis1* has 13 exons and stretches over 138.5 kb, we focused on exon 8 to better visualize its splicing (Figure S3C). The Sashimi plots show clear exon skipping (Figure S3D). This suggests that, although exon 8 can be present or absent, there is a significant preference for its expression in HSCs, resulting in a junction reads ratio of about 1:10. Indeed,



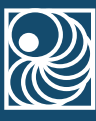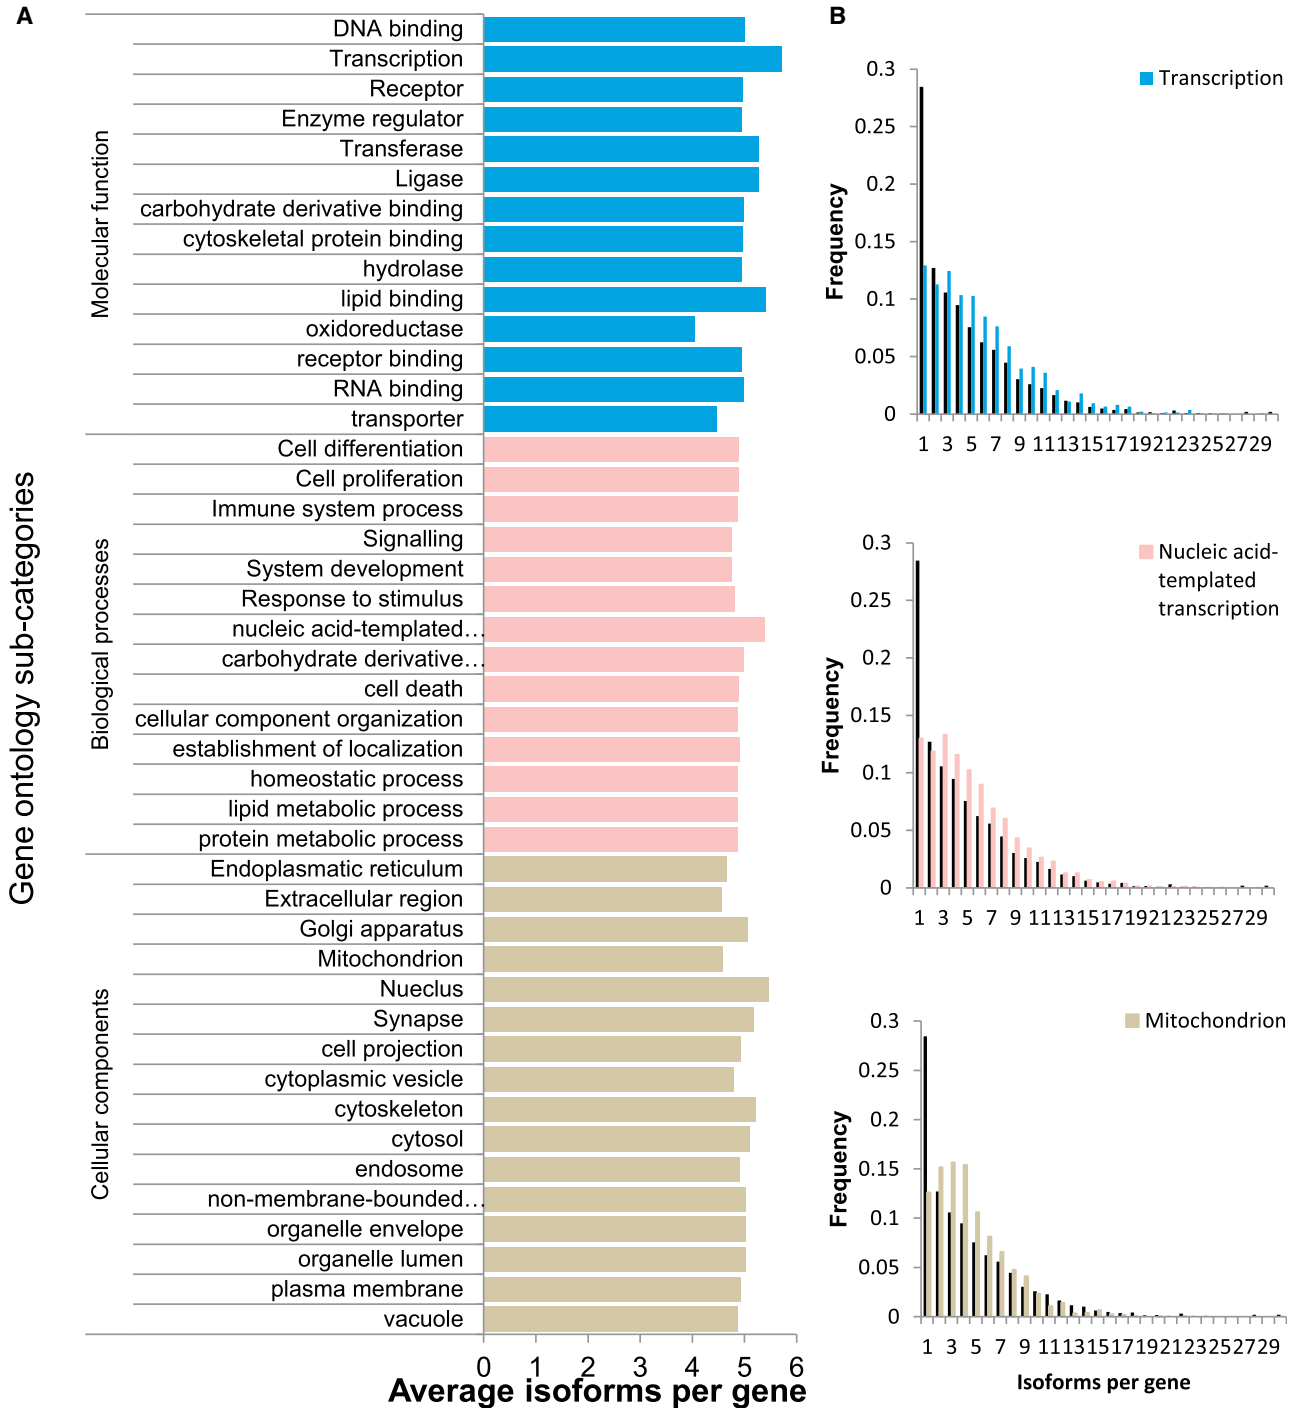

**Figure 2. Alternative Splicing Is Prevalent within Various Groups of Annotated Genes**

(A) The average number of isoforms in each gene ontology annotation subcategory.

(B) Graphs of the number of isoforms per gene for a representative gene from each of the major gene ontology annotation subcategories shown in (A).

qRT-PCR validation found the same preference for the expression of exon 8 as part of *Meis1* in HSCs (Figures S3E and S3F). Importantly, the agreement between the RNA-

seq analysis and the qRT-PCR assay again supports our findings and the validity of junction-indication as a quantification proxy for AS measure in HSCs.

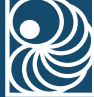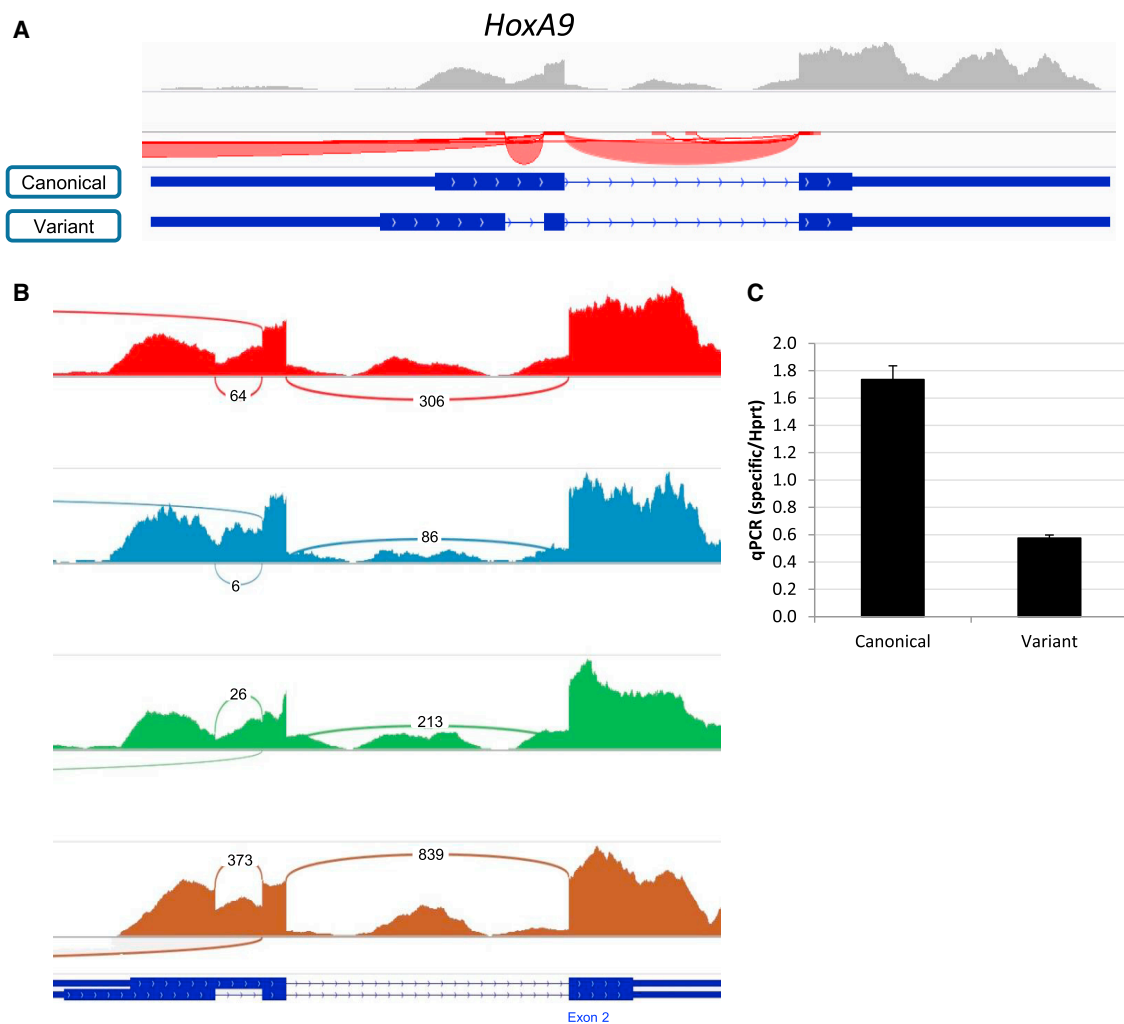

**Figure 3. Two Isoforms of *HoxA9* Are Expressed in Mouse HSCs**

(A) Raw RNA-seq data showing the known isoforms of *HoxA9* (canonical, NM\_010456; variant, NM\_001277238), read coverage (upward pointing gray bars), and junctions (red arches that face downward because *HoxA9* is transcribed from the negative strand) as shown in the IGV browser. Known exons are represented by blue rectangles, which are wide for open reading frames and narrow for UTRs; both canonical and variant forms are presented.

(B) A Sashimi plot of *HoxA9* from four samples (A0, B0, B1, and A3, in descending order, respectively). Raw reads are visualized by bar height and splice junctions, and their respective read numbers are shown by the connecting arcs.

(C) Histogram chart showing the expression of each isoform relative to *Hprt*. Data of technical triplicate average  $\pm$  SD from one representative experiment out of four are shown.

### ***Prdm16* Variant Is More Common than “Canonical” Isoform in HSCs**

PR-domain-containing 16 (*Prdm16*) is a transcription regulator in normal HSCs and an oncogene in leukemia (Aguilo et al., 2011; Matsuo et al., 2015). Analysis of *Prdm16* splicing using IGV visualization surprisingly indicated that it seems to express more of the variant isoform that lacks the second-to-last exon (Figure 4A right-end). This is better visualized using Sashimi plots, which show that although “canonical” reads connect all exons sequentially,

there are more “variant” junction reads, suggesting that the alternative is more abundant than the canonical form (Figure 4B). This caught our attention, as we previously found *Prdm16* to be preferentially expressed in HSCs (Gazit et al., 2013). qRT-PCR validation of *Prdm16* isoforms indeed found significantly more of the isoform “variant” in comparison with the “canonical” isoform (Figures S4A, S4B, and 4). The rarity of HSCs suggest that if they preferentially express an isoform that is a minor in other cells then reference data would likely annotate it as “variant.”

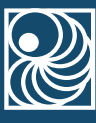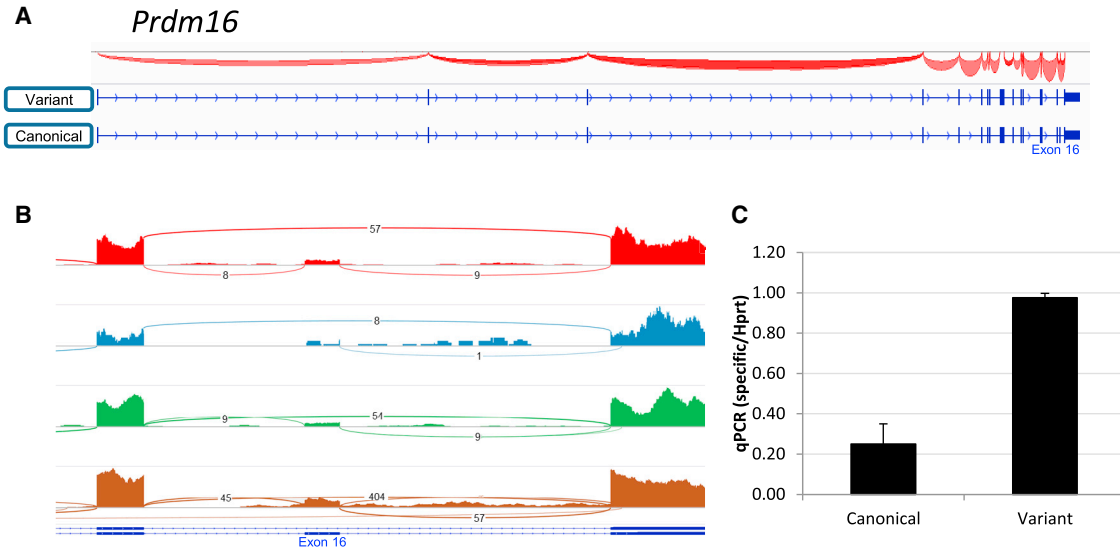

#### Figure 4. *Prdm16* Predominantly Expresses a Variant Isoform in Mouse HSCs

(A) Raw RNA-seq data showing two isoforms of *Prdm16* that are transcribed in HSCs (canonical, NM\_027504; variant, NM\_001177995), along with splice junctions from the IGV browser.

(B) A Sashimi plot of *Prdm16*, zooming in on the splice junction that skips exon 16. Data for the plot were taken from four samples (A0, B0, B1, and A3, in descending order, respectively).

(C) Histogram of the expression of each isoform relative to *Hprt*. Data of technical triplicate average  $\pm$  SD from one representative experiment out of four are shown.

#### *Nadk2* Expresses Multiple Isoforms

We next wondered whether some genes express more than two major isoforms in HSCs. We zoomed in on the nicotinamide adenine dinucleotide (NAD) kinase 2 mitochondrial gene (*Nadk2*), which codes for a metabolic enzyme that phosphorylates NAD<sup>+</sup> into NADP<sup>+</sup>. *Nadk2* is a rather large gene, with 13 exons stretching over almost 40 kb (Figure S4C). Our IGV analysis had indicated that several of its exons might be spliced out or retained (Figures S4C–S4J), generating multiple isoforms expressed in HSCs (Figures S4G–S4I). qRT-PCR validation found good agreement with the RNA-seq data (Figures S4C–S4J). A Sashimi plot clearly shows multiple alternative transcripts in *Nadk2* (Figure S4H). Intriguingly, it is still possible that multiple exons combine into various isoforms, and we attribute the identified junctions to specific transcripts, although this is not certain. Methods such as RNA-seq or qPCR, which record short fragments of the gene, cannot directly determine the presence of unconventional transcripts that assemble exons in a unique way when multiple splice junctions are present at substantial frequencies.

#### *CDKn1c* Expresses an Unannotated Isoform in Mouse HSCs

In addition to the successful identification of known isoforms, we sought to discover unknown splicing in HSC genes. HSCs are so rare that, if they do express unique

splicing, it might not have been detected by previous studies. Indeed, we have identified that *CDKn1c* (also known as *p57* or *Kip2*) expresses an unannotated isoform. As shown in Figure 5A, there is an alternative donor site for exon 2, while the acceptor site remains unchanged. The alternative form includes 36 additional bases at the 3' of exon 2, not disturbing the reading frame. An examination of the two splicing forms in the Sashimi plot suggests they are expressed in similar levels (Figure 5B). qRT-PCR validated the expression of both the known and the previously unknown splicing in HSCs (Figure 5C). *CDKn1c* (*p57*) is a major regulator of the cell cycle and was recently reported to play a major role in HSC quiescence, which is known to be required for their long-term activity in vivo (Matsumoto et al., 2011). However, this unique splicing was not previously published in the mouse and was not present on either the Ensembl or the UCSC genome browsers when we searched them. We further searched evolutionary relevance for this splicing, finding that while it has not previously been identified in murine data, there is an indication for its presence in human data (human genome hg38 assembly, data not shown). Interestingly, this short addition includes a putative phosphoserine site on position S268 of the variant. This lends further support to the discovery of this unannotated splicing in the mouse and demonstrates that previously unrecognized transcripts can be directly revealed by the mapped RNA-seq data

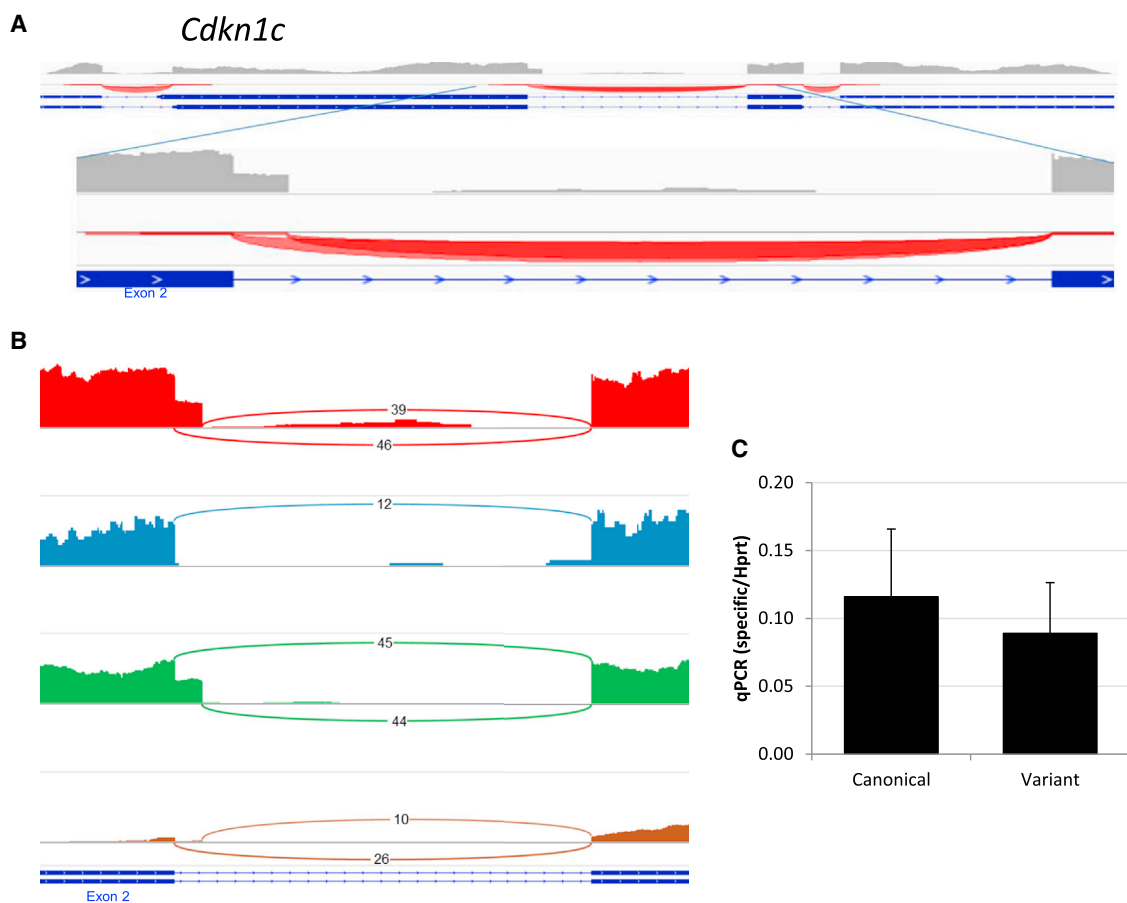

### Figure 5. *CDKN1C* Has an Unannotated Isoform in Mouse HSCs in Addition to the Canonical One

(A) Raw RNA-seq data showing two known isoforms (from Ensembl). Raw reads and junctions are from the IGV browser. Note that the expressed variant isoform is unannotated according to the Ensembl or RefSeq databases. The enlarged area demonstrates multiple reads from a part of the sequence thought to be part of an intron.

(B) A Sashimi plot of *CDKN1C*. The read number is represented by the height of the schematic; the connecting arcs represent splice junctions. The data were taken from four samples (A0, B0, B1, and A3, in descending order, respectively).

(C) Histogram chart of the expression of each isoform relative to *Hprt*. Data of technical triplicate average  $\pm$  SD from one representative experiment out of four are shown.

presented here. While *CDKN1C* T143 phosphorylation was reported to play a role in CDKi activity (Joaquin et al., 2012), this S268 putative site was not yet studied.

### *Pbx1* Isoforms Present Similar Phenotypes while *Hlf* Isoforms Have a Different Function

To test whether different isoforms retain their function, we focused on *Pbx1* and *Hlf*, which were mostly studied for their oncogenic role as part of E2A-PBX1 and E2A-HLF translocations, respectively. We have previously focused our attention on hepatic leukemia factor (*Hlf*), due to its very robust function *ex vivo* (Gazit et al., 2013), and both genes are part of the core-reprogramming factors for iHSC (Riddell et al., 2014). Our current RNA-seq analysis identified a variant of *Hlf* that lacks a short portion of its N termi-

nus (Figures 6A and 6B), and a *Pbx1* isoform that skips exon 8, which is suggested to cause a frameshift of the subsequent ninth exon and truncate the C terminus of the protein (Figure S6). To functionally test isoform activity, we cloned both genes from the primary HSC cDNA library into a lentiviral vector. Sequencing further validated these *Hlf2* and *Pbx1*-short isoforms, and the fluorescent reporter of the lentiviral vector showed similar expression levels of the canonical and the variant forms (data not shown). Notably, a phenotypical difference between these variants could not be predicted using current tools (such as Ensembl and Pfam). Functional examination found that the canonical *Hlf* isoform endowed primary cells with a robust growth advantage *in vitro*, but the shorter *Hlf* variant did not (Figure 6C). This demonstrates that even one exon



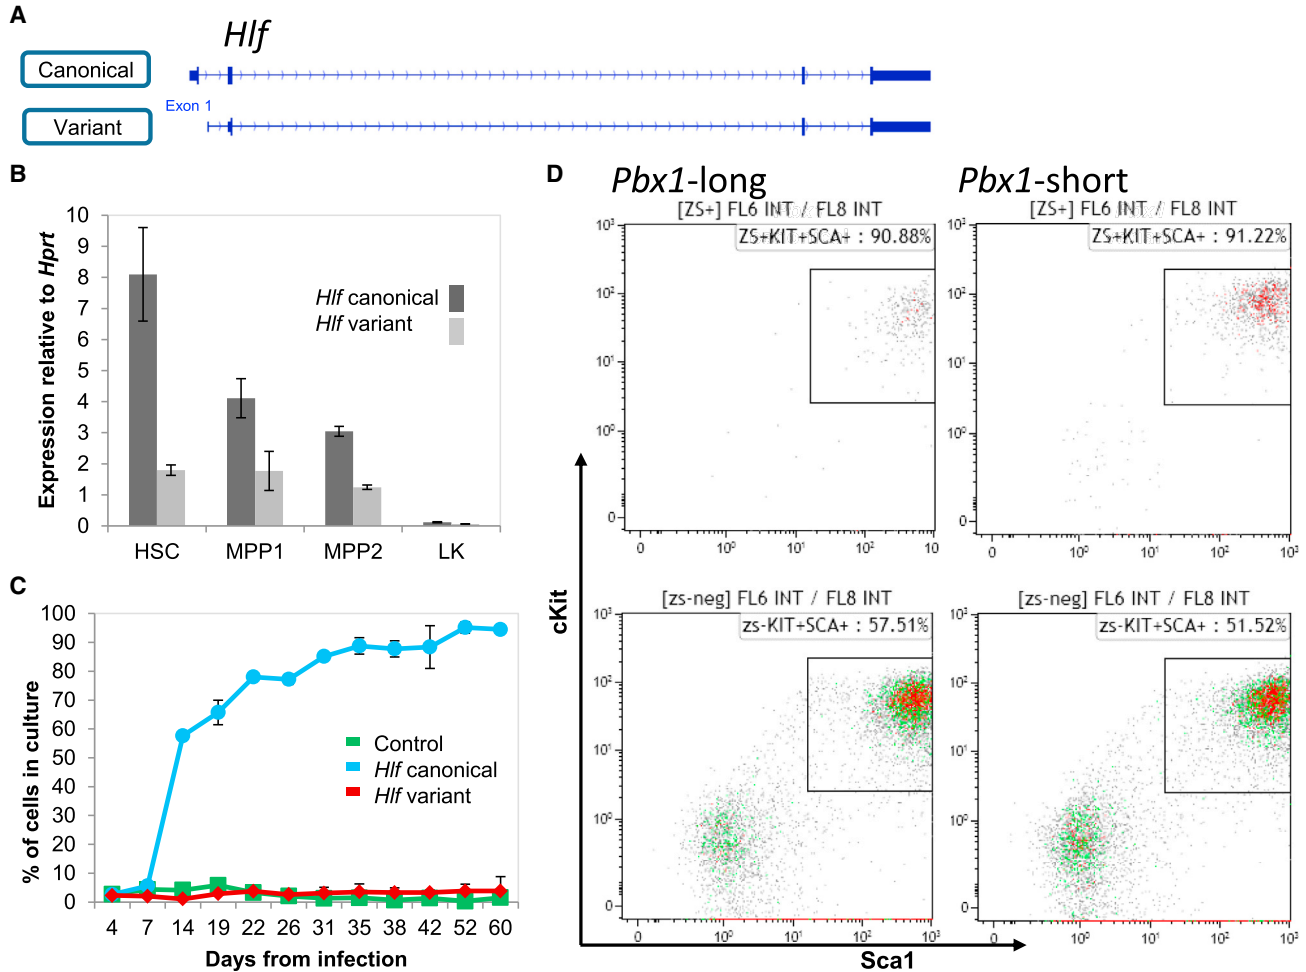

**Figure 6. Functionally Divergent Activity of the Alternatively Spliced Variants of *Hlf* and *Pbx1***

(A) Schematic of the *Hlf* gene.

(B) Expression of *Hlf* variants 1 and 2 (*Hlf1* and *Hlf2*) relative to *Hprt* in mouse HSCs in two types of multipotent progenitors (MPP1 and MPP2), and in a population of committed progenitors (Lineage cKit<sup>+</sup>Sca1<sup>+</sup>, sometimes called LK cells). Data of technical triplicate average  $\pm$  SD from one representative experiment out of four are shown.

(C) *Hlf1* provides a growth advantage in culture compared with *Hlf2*. Graph showing frequencies of *Hlf1* (blue), *Hlf2* (red), and reporter-only controls (green) in separate cultures over time. *Hlf1* increased in frequency over time, as reported by Gazit et al. (2013), whereas *Hlf2* did not. Data of technical duplicate average  $\pm$  SD from one representative experiment out of five are shown.

(D) Both canonical (*Pbx1*-long) and variant (*Pbx1*-short) forms of *Pbx1* increase cKit and Sca1 expression in vitro. Fluorescence-activated cell sorting plots of cells overexpressing the indicated factor (top panels) or controls (bottom panels) show the frequencies of cKit<sup>+</sup>Sca1<sup>+</sup> in primary cells after 4 weeks in vitro. Representative data are shown for one of three independent experiments. Control vectors are identical to *Pbx1* vectors with the exception of the coding sequence. Plots are representative from one experiment out of three.

difference in a spliced transcript might abrogate functional activity. *Pbx1*-long overexpression in primary bone marrow cells enhances the expression of HSC markers cKit and Sca-1 (Figure 6D), and the isoform *Pbx1*-short had a similar impact (no significant difference between *Pbx1*-short and -long, Figure 6D). Thus, the isoforms of *Pbx1*, which are both expressed in HSCs, have similar functional impact as measured by in vitro assay. It would be interesting to further study the relative expression and the possible

activities of these isoforms in vivo. Knowledge of the transcriptional information on each and every gene widens the array of opportunities for many future studies regarding known and unknown HSC factors.

#### Transcriptome-wide Splicing Landscape Visualized at Single-Gene Resolution on the UCSC Genome Browser

Our finding of extensive splicing in HSC genes suggests that other researchers would be interested in knowing the

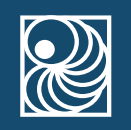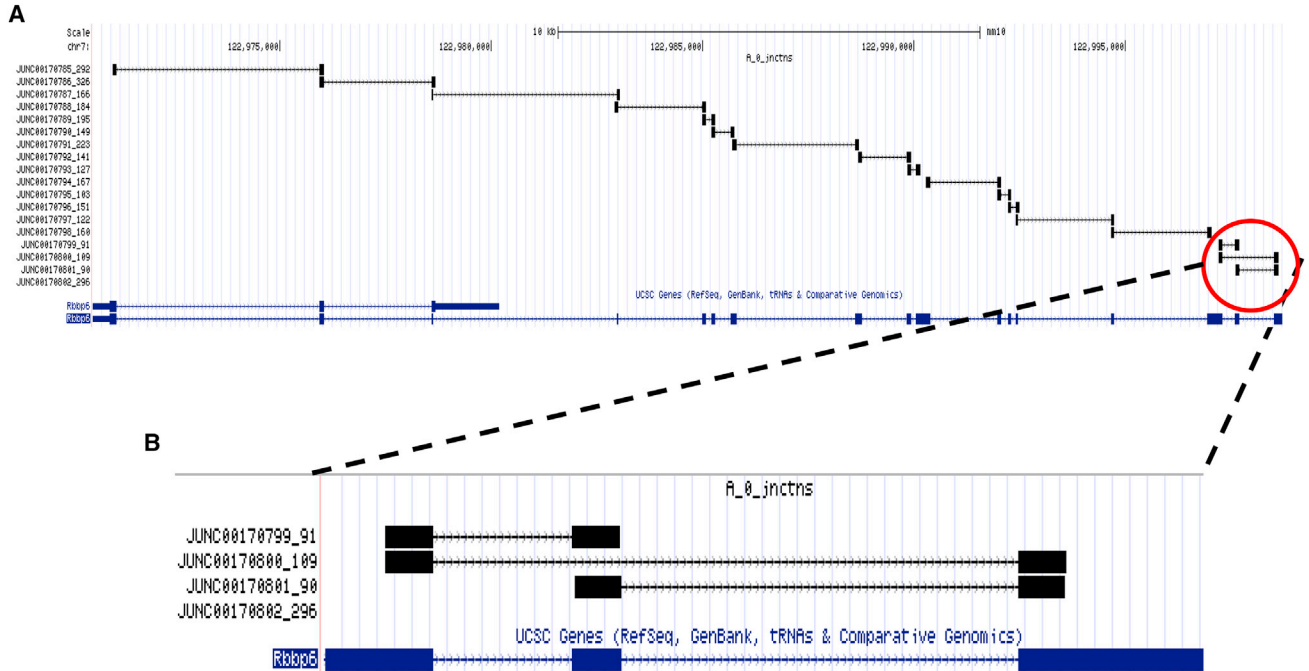

**Figure 7. Visualizing Complete Alternative Splicing Data for the Mouse HSC on the UCSC Genome Browser**

(A) The entire *Rbbp6* gene on the UCSC browser. The reference gene sequence is in blue; splice junctions and numbers above in black. (B) A zoomed-in view of the splice site over exon 16; the box between the junctions and the gene shows the number of junctions to which the marker points.

actual splicing of their specific gene(s) of interest. Toward that end, we generated a visualization of all the RNA-seq data aligned to the mouse genome, with an emphasis on junction reads. While the IGV software has graphical advantages, it may not be as easily accessible to every researcher, whereas the UCSC browser is familiar to many scientists and available online. An example is shown for the *Rbbp6* gene, with clear expression of its long transcript (Figure 7A) and of an AS event that skips an exon and results in two variant isoforms (Figure 7B); we added a manual in the Supplemental Information that explains how to use our tracks online. The UCSC browser is easily accessible and allows convenient viewing of additional resources from various organisms, with known and predicted isoforms of the gene of interest, as noted above for *CDKn1c*, making this aspect of our study helpful for many researchers.

## DISCUSSION

Better understanding of adult stem cells will expand their use in a field that is led by HSCs, which already saves tens of thousands of patients every year if a matched donor is available. Recent advancements have been fueled by extensive transcriptome profiling. However, to date, such data

were only analyzed at the crude discrete gene level, whereas most genes may express various AS. We have previously noted AS in a few HSC genes of interest and recognized the research need for an accessible splicing map of the mouse HSC transcriptome.

Extensive microarray datasets have been published previously. The ImmGen consortium offers unique data that were generated by multiple groups following a unified and strict protocol. We have previously analyzed this dataset to reveal genes that are preferentially expressed in stem and progenitor cells (Gazit et al., 2013). Splice variation might be extracted from microarrays, as was elegantly published with regard to B and T cells (Ergun et al., 2013). Emerging RNA-seq data offer a direct AS indication. We aimed to analyze data from both microarrays and RNA-seq in order to map splicing in HSCs. Comparing the independent sets of data bears a risk of combining unrelated pieces of information. Nevertheless, despite protocol, technical, and geographical differences, there is a good expression correlation between the microarray and RNA-seq datasets for mouse HSCs. This may attest to adequate identification and sorting of the HSC population by different laboratories. It is conceivable that some probe sets do not perfectly correlate with RNA-seq, and that some genes are less efficiently detected by current sequencing (e.g., if they have a high GC content).

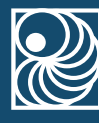

Our analysis of AS in microarrays was not validated. This must be highlighted in contrast to the previous successful analysis of AS from microarrays (Ergun et al., 2013). Several differences may account for this conflict. First, B and T cells are more clearly distinguishable cell types allowing a pairwise comparison; Second, Ergun et al. used RNA-seq data that were specifically generated by the same group; Third, there might be a basic difference between effector cells that express lineage-specific genes and stem cells that have to sustain multilineage potential and yet keep lineage-specific loci open.

Microarray datasets still present a major advantage in terms of data breadth, as they cover many hematopoietic and immune cell types. Indeed, several genes that are annotated as having a role in splicing show clear preferential expression in HSCs, and other splicing factors are preferential to other cell types, suggesting a rationale and specific candidate regulators for different splicing across the hematopoietic system. Interestingly, *Msi2*, which is annotated as having a role in splicing and which was discovered to be an essential regulator of HSCs and aggressive leukemia (Kharas et al., 2010), shows clear preferential expression in HSCs in our data. *Msi2* is better known for its role in regulating translation, and our analysis now adds another possible mechanism by which it may influence HSCs. Interestingly, overexpression of human *MSI2* was reported to expand HSCs via attenuation of the aryl hydrocarbon receptor pathway as an RNA-binding protein (Rentas et al., 2016). *MSI2* also plays a role in malignancy, thus understanding the possible relevance of splicing and RNA regulation in normal stem cells may reveal another layer of regulation (and mis-regulation) in cancer and in cancer stem cells (Barbouti et al., 2003; de Andres-Aguayo et al., 2011; Kharas et al., 2010).

Splicing is prevalent among all gene types, and transcription-regulating genes seem to have more isoforms on average. Notably, almost all of the HSC genes (Gazit et al., 2013) show expression of two or more isoforms. This indicates that, even within a highly purified population of primary cells, there is substantial diversity with regard to the way genes are expressed. We must stress that our analysis is at the population level. It is still possible that individual cells express just one isoform or another, such that the observed variability is between cells. Nevertheless, studies of other cell types reported the co-expression of different isoforms within single cells (Gurskaya et al., 2012), and there is no reason to suspect that HSCs would behave differently. Functional heterogeneity of HSCs had been correlated with levels of the CD150 surface marker (Hock, 2010), and it is intriguing to investigate the possible correlation of splicing variation with HSCs subtypes.

Mapping of AS within HSCs is of interest to many researchers, yet not all are comfortable with using profes-

sional software that requires downloading and managing big input files, as is the case for IGV and BAM files. The availability of a user-friendly online version is of interest and benefit to the community. We chose to upload our analyzed data onto the UCSC genome browser in order to facilitate easy access and gene-specific resolution for splicing events in HSCs. Many research groups focus on a specific gene of interest and open-access whole-genome coverage with resolution at the nucleotide level will benefit current understanding and future research.

Molecular understanding of HSCs has progressed thanks to extensive transcriptome data. Our study presents a comprehensive analysis of splice variants in mouse HSCs, revealing multiple splicing in HSC genes, and offering a valuable tool with easily accessible information on any gene of interest, including known and unknown transcripts. With the accelerated generation of high-quality RNA-seq data, similar analysis of HSCs through normal development, quiescence, and induced activation are expected to bring another dimension to understanding of the molecular mechanisms of adult stem cells.

## EXPERIMENTAL PROCEDURES

### Identification of Splicing from Microarray Data

The exon/gene expression ratios of 4,321 differentially spliced exons in 172 cell populations were obtained from Ergun et al. (2013). Significantly low or high expression within the HSC population (sample SC.LTSL.BM) was calculated in comparison with either all other 171 cell types, or the Progenitors group (samples SC.LTSL.FL, SC.STSL.FL, SC.LTSL.BM, SC.STSL.BM, SC.GMP.BM, SC.MEP.BM, SC.MPP34F.BM, and SC.ST34F.BM). The *p* values were adjusted for multiple testing using a false discovery rate (FDR). Exons with an FDR-adjusted *p* < 0.01 and fold-change > 1.2 (up- or downregulation) were considered as alternatively spliced.

### HSC Sort and qRT-PCR

For the validation of splicing, we used 6-month-old C57BL/6 mice housed at BGU's animal facility. Experiments were approved according to the local and state ethics committee. Cells from the femur, pelvis, and tibia were obtained by crushing followed by cKit enrichment using magnetic beads (Miltenyi Biotec). Enriched cells were stained for Lineage (Ter119, CD11b, GR-1, CD3e, CD4, CD8, and B220), Sca1, cKit, CD34, and flk2 (BioLegend). Sorted cells (FACSARIA; BD) were stored in TRIzol (Invitrogen). RNA was extracted according to the manufacturer's protocol, followed by reverse transcription using SuperScript (Invitrogen). qPCR reactions were run on LightCycler 480 (Roche); primers are given in Table S2.

### Splicing-Factors Analysis and Comparison of the Microarray and RNA-Seq Datasets

Expression levels of 216 splicing factors in 248 cell types were retrieved from ImmGen's microarrays. Relative expression levels



were visualized using Gene-E (Broad Institute). To compare gene expression we plotted the log<sub>2</sub> expression values, using a cutoff of >1, from the ImmGen microarray and from each RNA-seq sample. Correlation was calculated pairwise for each RNA-seq sample.

### Bioinformatics Analysis of Splicing from RNA-Seq Data

RNA-seq data on HSCs was obtained from four studies (Cabezas-Wallscheid et al., 2014; Qian et al., 2016; Sun et al., 2014; Venkatraman et al., 2013). The sample numbers are provided in the Supplemental Information (Table S1). Reads were aligned to the *Mus musculus* mm10 genome using TopHat (Trapnell et al., 2009). Cufflinks was used to assemble the reads into transcripts (Trapnell et al., 2012). The data from all samples were combined into one file indicating junctions and transcripts/genes of all datasets together, following data unification; expression values of genes and transcripts were defined per sample, and the results are presented per individual sample (best depicted in the Sashimi plots). For the analysis of splicing prevalence within annotated groups of genes (Figures 2 and S2), all datasets were combined, and numbers of isoforms were counted for all of the detected genes and for the indicated GO-annotated groups; distribution of the discrete proportion of the number of isoforms per gene was visualized as histograms of discrete proportions. Visualization of HSC genes and multiple other alternatively spliced transcripts was done using the IGV browser (Robinson et al., 2011) in order to validate bioinformatic data and predictions. All the splicing-junctions data obtained in this study were uploaded onto the UCSC genome browser; it can be accessed by copying the following link into a web browser: <http://bioinfo.bgu.ac.il/genomes/RoiG/UCSC>. To search for a gene, type its symbol on the searchbar or use genomic position. Modify the shown channels to fit your needs: we suggest starting with "HIDE" or "DENSE" for TopHat reads and "FULL" for Cufflink junctions. The actual number of counted junctions is given next to its indicator (left of the screen). The splice data viewed in the UCSC website were generated via TopHat and yielded slightly higher numbers than the ".bed" file and the Sashimi plots. This minute change does not alter splicing events. A graphical user manual can be found in the Supplemental Information.

### Ex Vivo Functional Examination of Splice Variants

Experiments were carried out as previously reported (Gazit et al., 2013). In brief, specific splicing isoforms of the genes of interest were individually cloned into pHAGE2 (Mostoslavsky et al., 2005) to generate lentiviruses that enabled induced expression in primary cells. Infected cells were readily identified by a reporter ZsGreen fluorescent protein. Specific marker expression was detected with conjugated antibodies (BioLegend) on a Gallios Flow Cytometer (Beckman Coulter) and Kaluza software. The primary cells for the ex vivo experiments were obtained according to the guidelines of the Institutional Animal Care and Use Committee of the Ben-Gurion University of the Negev, Beer Sheva, Israel.

### SUPPLEMENTAL INFORMATION

Supplemental Information includes a supplemental manual, six figures, and three tables and can be found with this article online at <http://dx.doi.org/10.1016/j.stemcr.2016.12.002>.

### AUTHORS CONTRIBUTIONS

O.G. performed the analysis, visualization, qRT-PCR, and writing of the manuscript; K.M. carried out *Hlf* functional experiments; N.B. helped with the computational analysis; Y.G. performed the cell culture and functional assays; M.F. did some of the qRT-PCR; H.N.G. and T.S. undertook part of the initial analysis of the ImmGen arrays and most of the RNA-seq analysis; R.G. supervised the study and wrote the manuscript.

### ACKNOWLEDGMENTS

We thank Ayla Ergun for initial discussions; Dan Peer for expert advice; Marianna Romzova for qRT-PCR advice; Vered Chalifa-Caspi and Inbar Plaschkes for their essential bioinformatics analysis of arrays and help with RNA-seq visualization on the UCSC browser. This study was supported by ISF grants 1690/13 and 2348/15, and CIG grant 618647.

Received: November 30, 2015

Revised: December 1, 2016

Accepted: December 1, 2016

Published: December 29, 2016

### REFERENCES

- Aaronson, Y., and Meshorer, E. (2013). Stem cells: regulation by alternative splicing. *Nature* 498, 176–177.
- Aguilo, F., Avagyan, S., Labar, A., Sevilla, A., Lee, D.F., Kumar, P., Lemischka, I.R., Zhou, B.Y., and Snoeck, H.W. (2011). Prdm16 is a physiologic regulator of hematopoietic stem cells. *Blood* 117, 5057–5066.
- Barbouti, A., Hoglund, M., Johansson, B., Lassen, C., Nilsson, P.G., Hagemeyer, A., Mitelman, F., and Fioretos, T. (2003). A novel gene, MSI2, encoding a putative RNA-binding protein is recurrently rearranged at disease progression of chronic myeloid leukemia and forms a fusion gene with HOXA9 as a result of the cryptic t(7;17)(p15;q23). *Cancer Res.* 63, 1202–1206.
- Bryder, D., Rossi, D.J., and Weissman, I.L. (2006). Hematopoietic stem cells: the paradigmatic tissue-specific stem cell. *Am. J. Pathol.* 169, 338–346.
- Cabezas-Wallscheid, N., Klimmeck, D., Hansson, J., Lipka, D.B., Reyes, A., Wang, Q., Weichenhan, D., Lier, A., von Paleske, L., Renders, S., et al. (2014). Identification of regulatory networks in HSCs and their immediate progeny via integrated proteome, transcriptome, and DNA methylome analysis. *Cell Stem Cell* 15, 507–522.
- Collins, C.T., and Hess, J.L. (2015). Role of HOXA9 in leukemia: dysregulation, cofactors and essential targets. *Oncogene* 35, 1080–1089.
- Copelan, E.A. (2006). Hematopoietic stem-cell transplantation. *N. Engl. J. Med.* 354, 1813–1826.



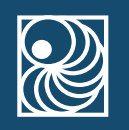

- de Andres-Aguayo, L., Varas, F., Kallin, E.M., Infante, J.F., Wurst, W., Floss, T., and Graf, T. (2011). Musashi 2 is a regulator of the HSC compartment identified by a retroviral insertion screen and knockout mice. *Blood* *118*, 554–564.
- de Andres-Aguayo, L., Varas, F., and Graf, T. (2012). Musashi 2 in hematopoiesis. *Curr. Opin. Hematol.* *19*, 268–272.
- Ergun, A., Doran, G., Costello, J.C., Paik, H.H., Collins, J.J., Mathis, D., Benoist, C., and ImmGen, C. (2013). Differential splicing across immune system lineages. *Proc. Natl. Acad. Sci. USA* *110*, 14324–14329.
- Fujimoto, S., Araki, K., Chisaka, O., Araki, M., Takagi, K., and Yamamura, K. (1998). Analysis of the murine Hoxa-9 cDNA: an alternatively spliced transcript encodes a truncated protein lacking the homeodomain. *Gene* *209*, 77–85.
- Gabut, M., Samavarchi-Tehrani, P., Wang, X., Slobodeniuc, V., O'Hanlon, D., Sung, H.K., Alvarez, M., Talukder, S., Pan, Q., Mazzoni, E.O., et al. (2011). An alternative splicing switch regulates embryonic stem cell pluripotency and reprogramming. *Cell* *147*, 132–146.
- Gazit, R., Weissman, I.L., and Rossi, D.J. (2008). Hematopoietic stem cells and the aging hematopoietic system. *Semin. Hematol.* *45*, 218–224.
- Gazit, R., Garrison, B.S., Rao, T.N., Shay, T., Costello, J., Ericson, J., Kim, F., Collins, J.J., Regev, A., Wagers, A.J., et al. (2013). Transcriptome analysis identifies regulators of hematopoietic stem and progenitor cells. *Stem Cell Rep.* *1*, 266–280.
- Gazit, R., Mandal, P.K., Ebina, W., Ben-Zvi, A., Nombela-Arrieta, C., Silberstein, L.E., and Rossi, D.J. (2014). Fgd5 identifies hematopoietic stem cells in the murine bone marrow. *J. Exp. Med.* *211*, 1314–1330.
- Gurskaya, N.G., Staroverov, D.B., Zhang, L., Fradkov, A.F., Markina, N.M., Pereverzev, A.P., and Lukyanov, K.A. (2012). Analysis of alternative splicing of cassette exons at single-cell level using two fluorescent proteins. *Nucleic Acids Res.* *40*, e57.
- Han, H., Irimia, M., Ross, P.J., Sung, H.K., Alipanahi, B., David, L., Golipour, A., Gabut, M., Michael, I.P., Nachman, E.N., et al. (2013). MBNL proteins repress ES-cell-specific alternative splicing and reprogramming. *Nature* *498*, 241–245.
- Hock, H. (2010). Some hematopoietic stem cells are more equal than others. *J. Exp. Med.* *207*, 1127–1130.
- Hooper, J.E. (2014). A survey of software for genome-wide discovery of differential splicing in RNA-Seq data. *Hum. Genomics* *8*, 3.
- Joaquin, M., Gubern, A., Gonzalez-Nunez, D., Josue Ruiz, E., Ferrero, I., de Nadal, E., Nebreda, A.R., and Posas, F. (2012). The p53 CDK1 integrates stress signals into cell-cycle progression to promote cell survival upon stress. *EMBO J.* *31*, 2952–2964.
- Kharas, M.G., Lengner, C.J., Al-Shahrour, F., Bullinger, L., Ball, B., Zaidi, S., Morgan, K., Tam, W., Paktinat, M., Okabe, R., et al. (2010). Musashi-2 regulates normal hematopoiesis and promotes aggressive myeloid leukemia. *Nat. Med.* *16*, 903–908.
- Kiel, M.J., Yilmaz, O.H., Iwashita, T., Yilmaz, O.H., Terhorst, C., and Morrison, S.J. (2005). SLAM family receptors distinguish hematopoietic stem and progenitor cells and reveal endothelial niches for stem cells. *Cell* *121*, 1109–1121.
- Matsumoto, A., Takeishi, S., Kanie, T., Susaki, E., Onoyama, I., Takeishi, Y., Nakayama, K., and Nakayama, K.I. (2011). p53 is required for quiescence and maintenance of adult hematopoietic stem cells. *Cell Stem Cell* *9*, 262–271.
- Matsuo, H., Goyama, S., Kamikubo, Y., and Adachi, S. (2015). The subtype-specific features of EVI1 and PRDM16 in acute myeloid leukemia. *Haematologica* *100*, e116–e117.
- Mostoslavsky, G., Kotton, D.N., Fabian, A.J., Gray, J.T., Lee, J.S., and Mulligan, R.C. (2005). Efficiency of transduction of highly purified murine hematopoietic stem cells by lentiviral and oncoretroviral vectors under conditions of minimal in vitro manipulation. *Mol. Ther.* *11*, 932–940.
- Nilsen, T.W., and Graveley, B.R. (2010). Expansion of the eukaryotic proteome by alternative splicing. *Nature* *463*, 457–463.
- Orkin, S.H., and Zon, L.I. (2008). Hematopoiesis: an evolving paradigm for stem cell biology. *Cell* *132*, 631–644.
- Osawa, M., Hanada, K., Hamada, H., and Nakauchi, H. (1996). Long-term lymphohematopoietic reconstitution by a single CD34-low/negative hematopoietic stem cell. *Science* *273*, 242–245.
- Qian, P., He, X.C., Paulson, A., Li, Z., Tao, F., Perry, J.M., Guo, F., Zhao, M., Zhi, L., Venkatraman, A., et al. (2016). The Dlk1-Gtl2 locus preserves LT-HSC function by inhibiting the PI3K-mTOR pathway to restrict mitochondrial metabolism. *Cell Stem Cell* *18*, 214–228.
- Rentas, S., Holzapfel, N.T., Belew, M.S., Pratt, G.A., Voisin, V., Wilhelm, B.T., Bader, G.D., Yeo, G.W., and Hope, K.J. (2016). Musashi-2 attenuates AHR signalling to expand human hematopoietic stem cells. *Nature* *532*, 508–511.
- Riddell, J., Gazit, R., Garrison, B.S., Guo, G., Saadatpour, A., Mandal, P.K., Ebina, W., Volchkov, P., Yuan, G.C., Orkin, S.H., et al. (2014). Reprogramming committed murine blood cells to induced hematopoietic stem cells with defined factors. *Cell* *157*, 549–564.
- Robinson, J.T., Thorvaldsdottir, H., Winckler, W., Guttman, M., Lander, E.S., Getz, G., and Mesirov, J.P. (2011). Integrative genomics viewer. *Nat. Biotechnol.* *29*, 24–26.
- Rosenbauer, F., and Tenen, D.G. (2007). Transcription factors in myeloid development: balancing differentiation with transformation. *Nat. Rev. Immunol.* *7*, 105–117.
- Rossi, L., Lin, K.K., Boles, N.C., Yang, L., King, K.Y., Jeong, M., Mayle, A., and Goodell, M.A. (2012). Less is more: unveiling the functional core of hematopoietic stem cells through knockout mice. *Cell Stem Cell* *11*, 302–317.
- Shay, T., and Kang, J. (2013). Immunological genome project and systems immunology. *Trends Immunol.* *34*, 602–609.
- Solana, J., Irimia, M., Ayoub, S., Orejuela, M.R., Zywitzka, V., Jens, M., Tapial, J., Ray, D., Morris, Q., Hughes, T.R., et al. (2016). Conserved functional antagonism of CELF and MBNL proteins controls stem cell-specific alternative splicing in planarians. *Elife* *5*, e16797.
- Spangrude, G.J., Heimfeld, S., and Weissman, I.L. (1988). Purification and characterization of mouse hematopoietic stem cells. *Science* *241*, 58–62.





- Steensma, D.P. (2012). Surprising splicing: the new most frequent class of genetic alteration in myelodysplastic syndromes. *Hematologist* 9, 5–7.
- Sun, D., Luo, M., Jeong, M., Rodriguez, B., Xia, Z., Hannah, R., Wang, H., Le, T., Faull, K.F., Chen, R., et al. (2014). Epigenomic profiling of young and aged HSCs reveals concerted changes during aging that reinforce self-renewal. *Cell Stem Cell* 14, 673–688.
- Thomas, E.D. (2005). Bone marrow transplantation from the personal viewpoint. *Int. J. Hematol.* 81, 89–93.
- Trapnell, C., Pachter, L., and Salzberg, S.L. (2009). TopHat: discovering splice junctions with RNA-Seq. *Bioinformatics* 25, 1105–1111.
- Trapnell, C., Roberts, A., Goff, L., Pertea, G., Kim, D., Kelley, D.R., Pimentel, H., Salzberg, S.L., Rinn, J.L., and Pachter, L. (2012). Differential gene and transcript expression analysis of RNA-seq experiments with TopHat and Cufflinks. *Nat. Protoc.* 7, 562–578.
- Venkatraman, A., He, X.C., Thorvaldsen, J.L., Sugimura, R., Perry, J.M., Tao, F., Zhao, M., Christenson, M.K., Sanchez, R., Yu, J.Y., et al. (2013). Maternal imprinting at the H19-Igf2 locus maintains adult haematopoietic stem cell quiescence. *Nature* 500, 345–349.
- Xiong, H.Y., Alipanahi, B., Lee, L.J., Bretschneider, H., Merico, D., Yuen, R.K., Hua, Y., Gueroussov, S., Najafabadi, H.S., Hughes, T.R., et al. (2015). RNA splicing. The human splicing code reveals new insights into the genetic determinants of disease. *Science* 347, 1254806.

**Stem Cell Reports, Volume 8**

**Supplemental Information**

**Mapping Whole-Transcriptome Splicing in Mouse Hematopoietic Stem  
Cells**

**Oron Goldstein, Karin Meyer, Yariv Greenshpan, Nir Bujanover, Mili Feigin, Hadas  
Ner-Gaon, Tal Shay, and Roi Gazit**

### **Supplementary Figure legends**

#### **Supplementary Figure 1: Prediction of alternative splicing from microarray data; related to figure 1.**

(A) All the exons implicated in AS from the microarray analysis list (x-axis) plotted against their fold change values in comparison with the normalized exon expression within their specific gene. Marked in red are exons excluded from the cutoff range we determined ( $\pm 1.2$ ). Exons in the blue range have a higher probability of AS, and are included in the cutoff we determined. (B) A list of the genes we attempted to validate from the microarray predictions. (C) Representative amplification curves of RT-qPCR for genes from panel B. (D) An expression correlation of annotated splicing-factors between RNA-seq (sample A0) and ImmGen's microarray.

#### **Supplementary Figure 2: Distribution of gene's isoforms across gene ontology (GO) annotation subcategories; related to figure 2.**

Histograms for isoform-per-gene distribution in: (A) the molecular function gene ontology annotation subcategory; (B) the biological processes gene ontology annotation subcategory; and (C) the cellular components gene ontology annotation subcategory. As a control, random groups of genes (D) are shown. Each plot contains the distribution of isoforms of all genes detected for comparison.

#### **Supplementary Figure 3: *HoxA9* and *Meis1* co-express two isoforms in mouse HSCs; related to figure 3.**

(A) A schematic view of both isoforms and the positioning of the unique primers (red arrows) used in real time PCR. Known exons are represented by blue rectangles. The rectangles are wide for coding region and narrow for untranslated regions (UTRs). (B) Real time PCR amplification curves for the specific isoforms, each amplification curve is visualized using a separate color, variant and canonical are indicated within the figure. (C) A schematic view of the two major isoforms of *Meis1* and the loci of the unique primers. (D) A Sashimi plot of *Meis1* zooming in on the splice junction that skips exon 8. The data were taken from four samples (A0, B0, B1, and A3, in descending order, respectively). (E) RT-qPCR amplification curves of canonical and variant isoforms of *Meis1*. (F) Histogram of the expression of each isoform relative to *Hprt*. Data is shown of technical triplicate average  $\pm$  SD from one representative experiment out of three.

#### **Supplementary Figure 4: Validation of alternatively spliced variants of *Prdm16* and *Nadk2* in HSC; related to figure 4.**

(A) A schematic view of the two major isoforms and the positioning of the unique primers used (red arrows). (B) Real time PCR amplification curves. Data shown is representative of one experiment out of four. (C) Raw RNA-Seq data showing two of *Nadk2*'s isoforms (canonical: NM\_001085410, variant: NM\_001040395), raw reads, and junctions from the IGV browser. (D) A Sashimi plot zooming in on the splice junction that skips exon 8. The data were taken from four samples (A0, B0, B1, and A3, in descending order, respectively). (E) A schematic view of the canonical and the exon 8-skipping isoform, with the positioning of the unique primers used (red arrows). (F) Real time PCR amplification curves of the indicated isoforms. Data shown is representative of one experiment out of four. (G) A Sashimi plot of the entirety of *Nadk2* from a representative sample (A0), demonstrating both alternative splicing events. (H) Histogram of the expression of the canonical isoform and the variant that skips exon 8 relative to *Hprt*. Data is shown of technical duplicate average  $\pm$  SD from one representative experiment out of four. (I) A Sashimi plot zooming in on the splice junction that skips exon 5; data taken from four samples (A0, B0, B1, and A3, in descending order, respectively). (J) Histogram chart of the expression of the canonical isoform and the variant that skips exon 5. Data is shown of technical duplicate average  $\pm$  SD from one representative experiment out of four.

#### **Supplementary Figure 5: Validation of the unannotated alternatively spliced variant of *CDKn1c* in mouse HSC; related to figure 5.**

(A) Sashimi plot of *CDKn1c* taken from all 10 samples (A0, B0, A1, B1, A2, B2, A3, B3, A4, and B4, in descending order, respectively). (B) Schematic view of both isoforms and the positioning of the unique primers (red arrows). (C) RT-qPCR amplification curves of indicated isoforms.

#### **Supplementary Figure 6: Two isoforms of *Pbx1s* are expressed to a similar extent in HSCs; related to figure 6.**

(A) Raw RNA-Seq data showing two of the *Pbx1* isoforms that are transcribed in mouse HSCs (from the Ensembl database), along with splice junctions from the IGV browser. (B) A Sashimi plot zooming in on the splice junction that skips exon 7, taken from a representative sample (A0). (C) A schematic view of the two major isoforms and the positioning of the unique primers used in real time PCR. (D) RT-qPCR amplification curves. Data shown is representative of one experiment out of four. (E) Histogram of the expression of each isoform relative to *Hprt*. Data is shown of technical duplicate average  $\pm$  SD from one representative experiment out of four.

# Supplementary Figure 1; related to figure 1

A

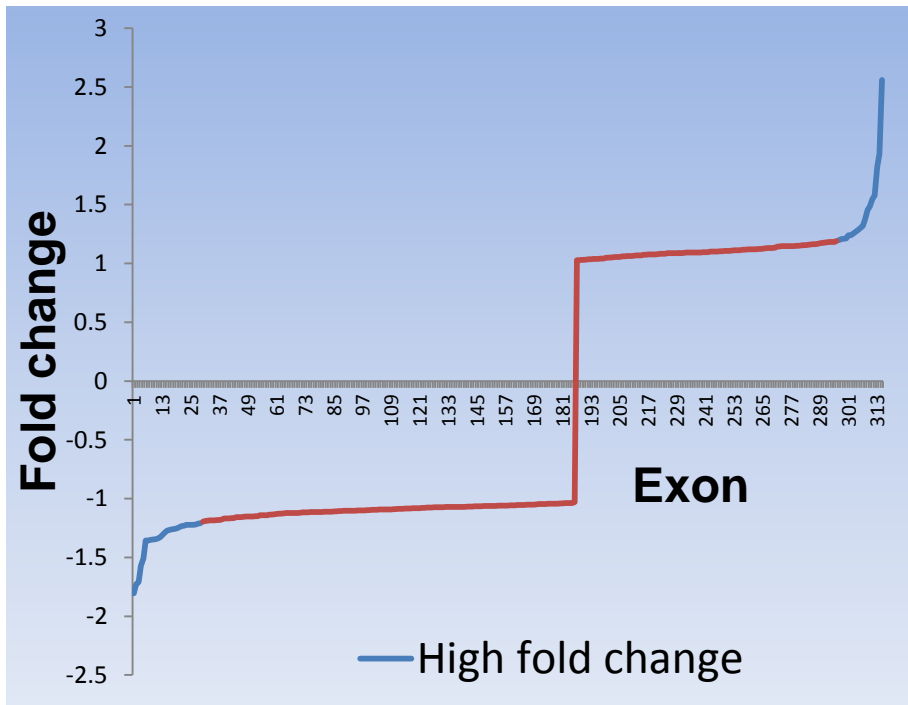

B

| Gene symbols |
|--------------|
| ANKrd27      |
| Zswim4       |
| Lrba         |
| Dock9        |
| Smpd4        |
| Tubcgp5      |
| Wdfy2        |

C

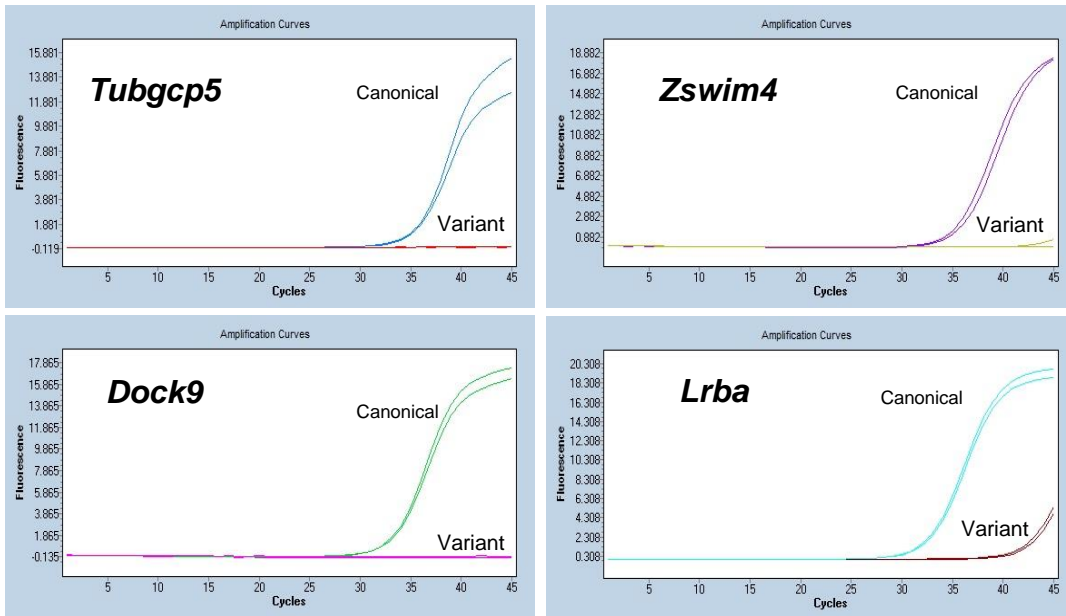

D

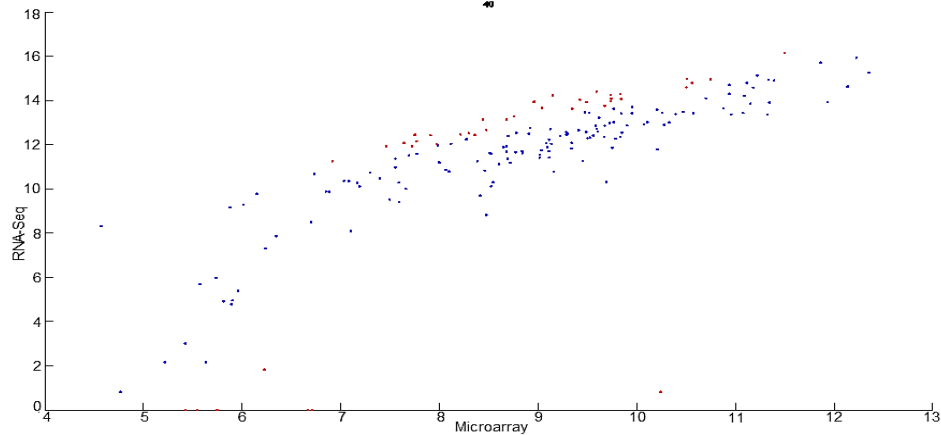

# Supplementary Figure 2; related to figure 2

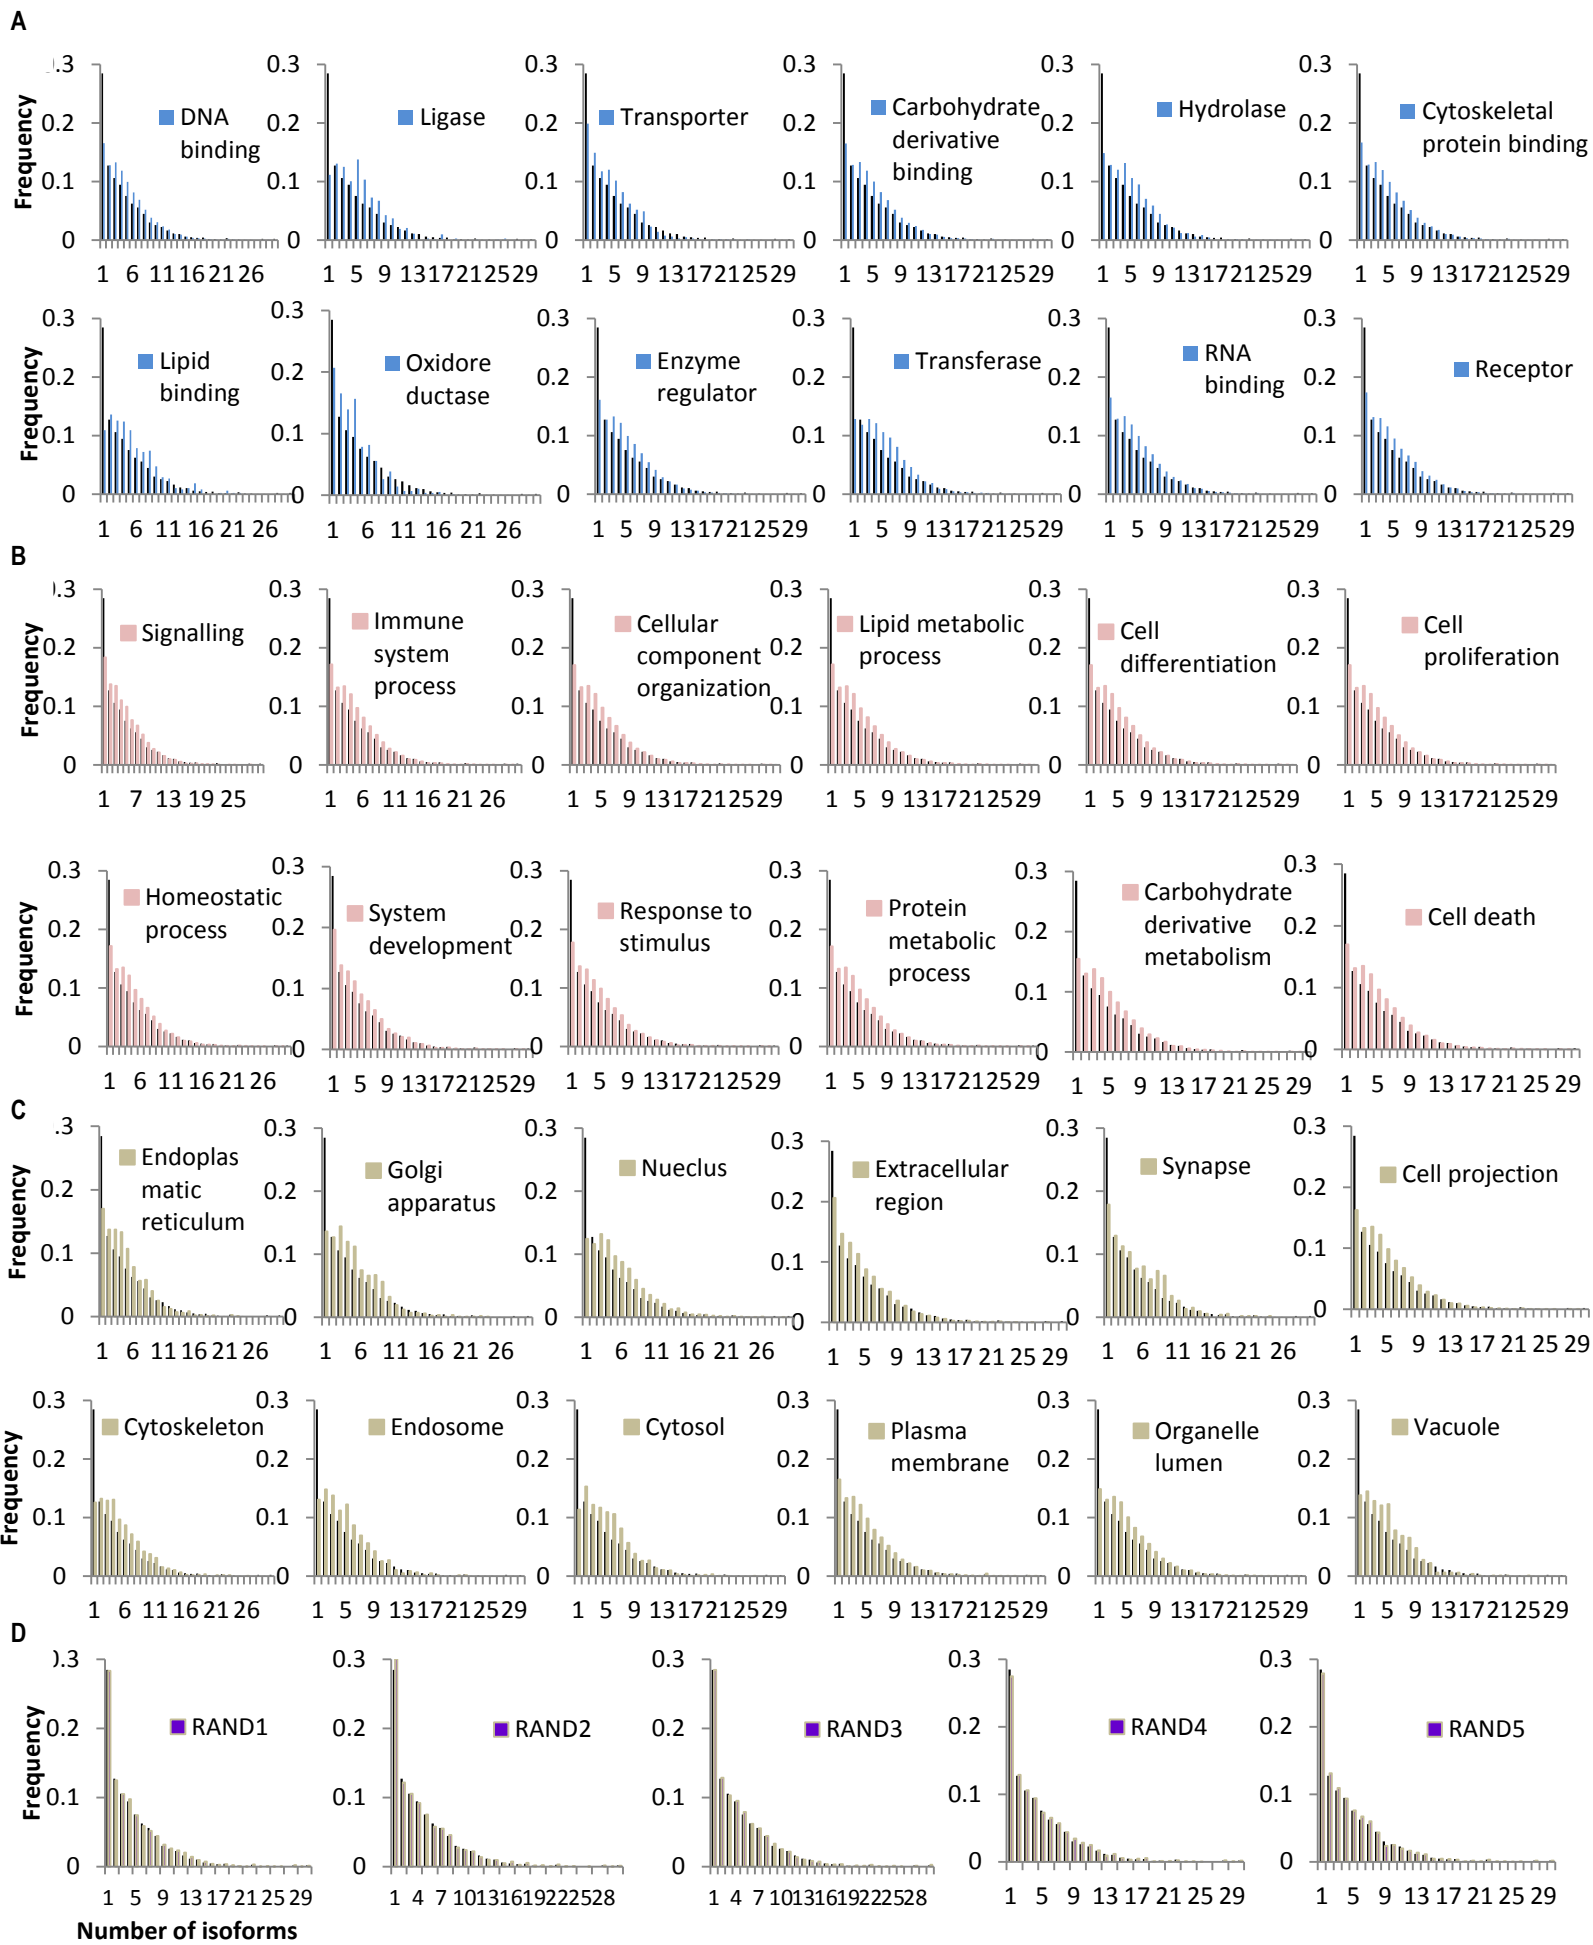



# Supplementary Figure 3; related to figure 3

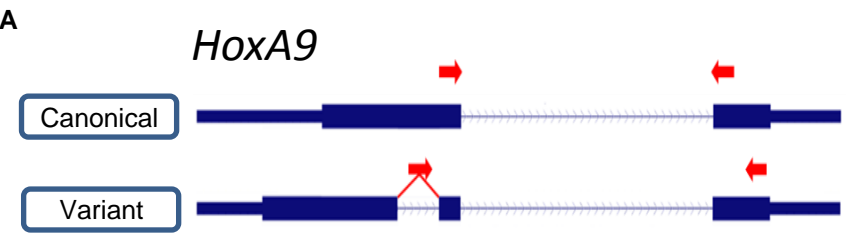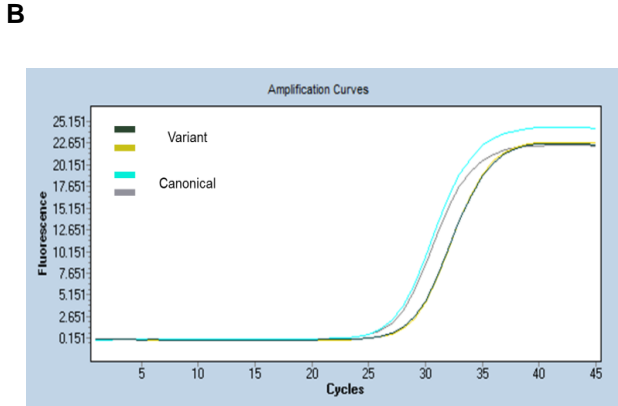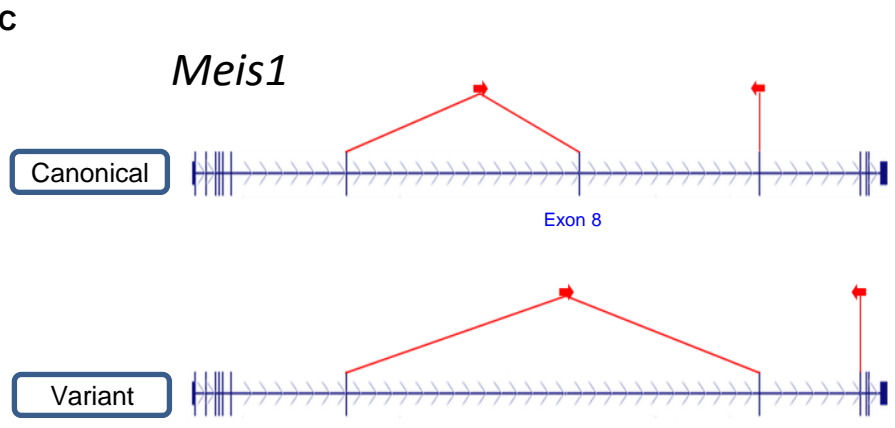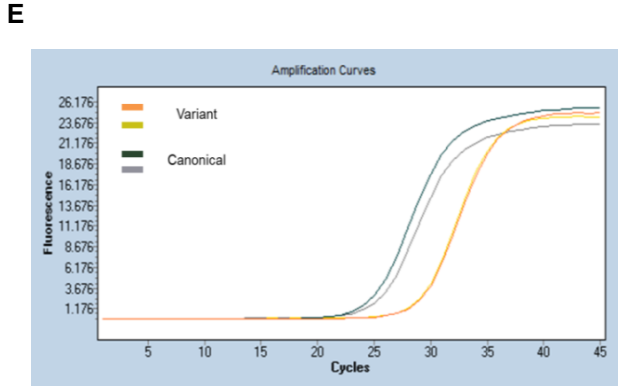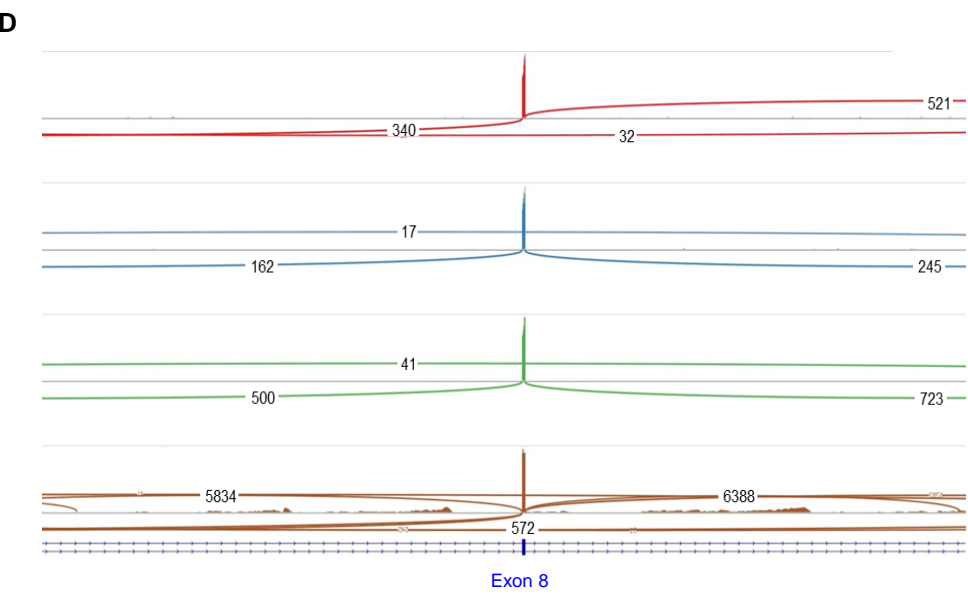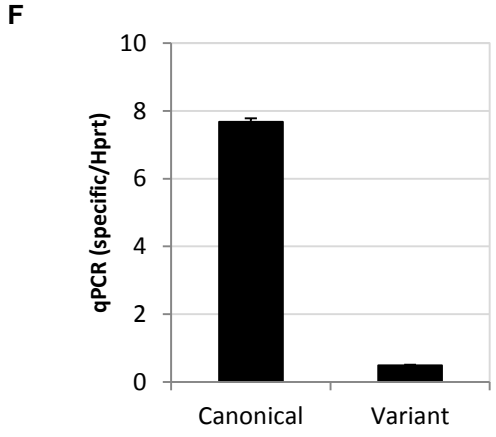

Supplementary Figure 4; related to figure 4

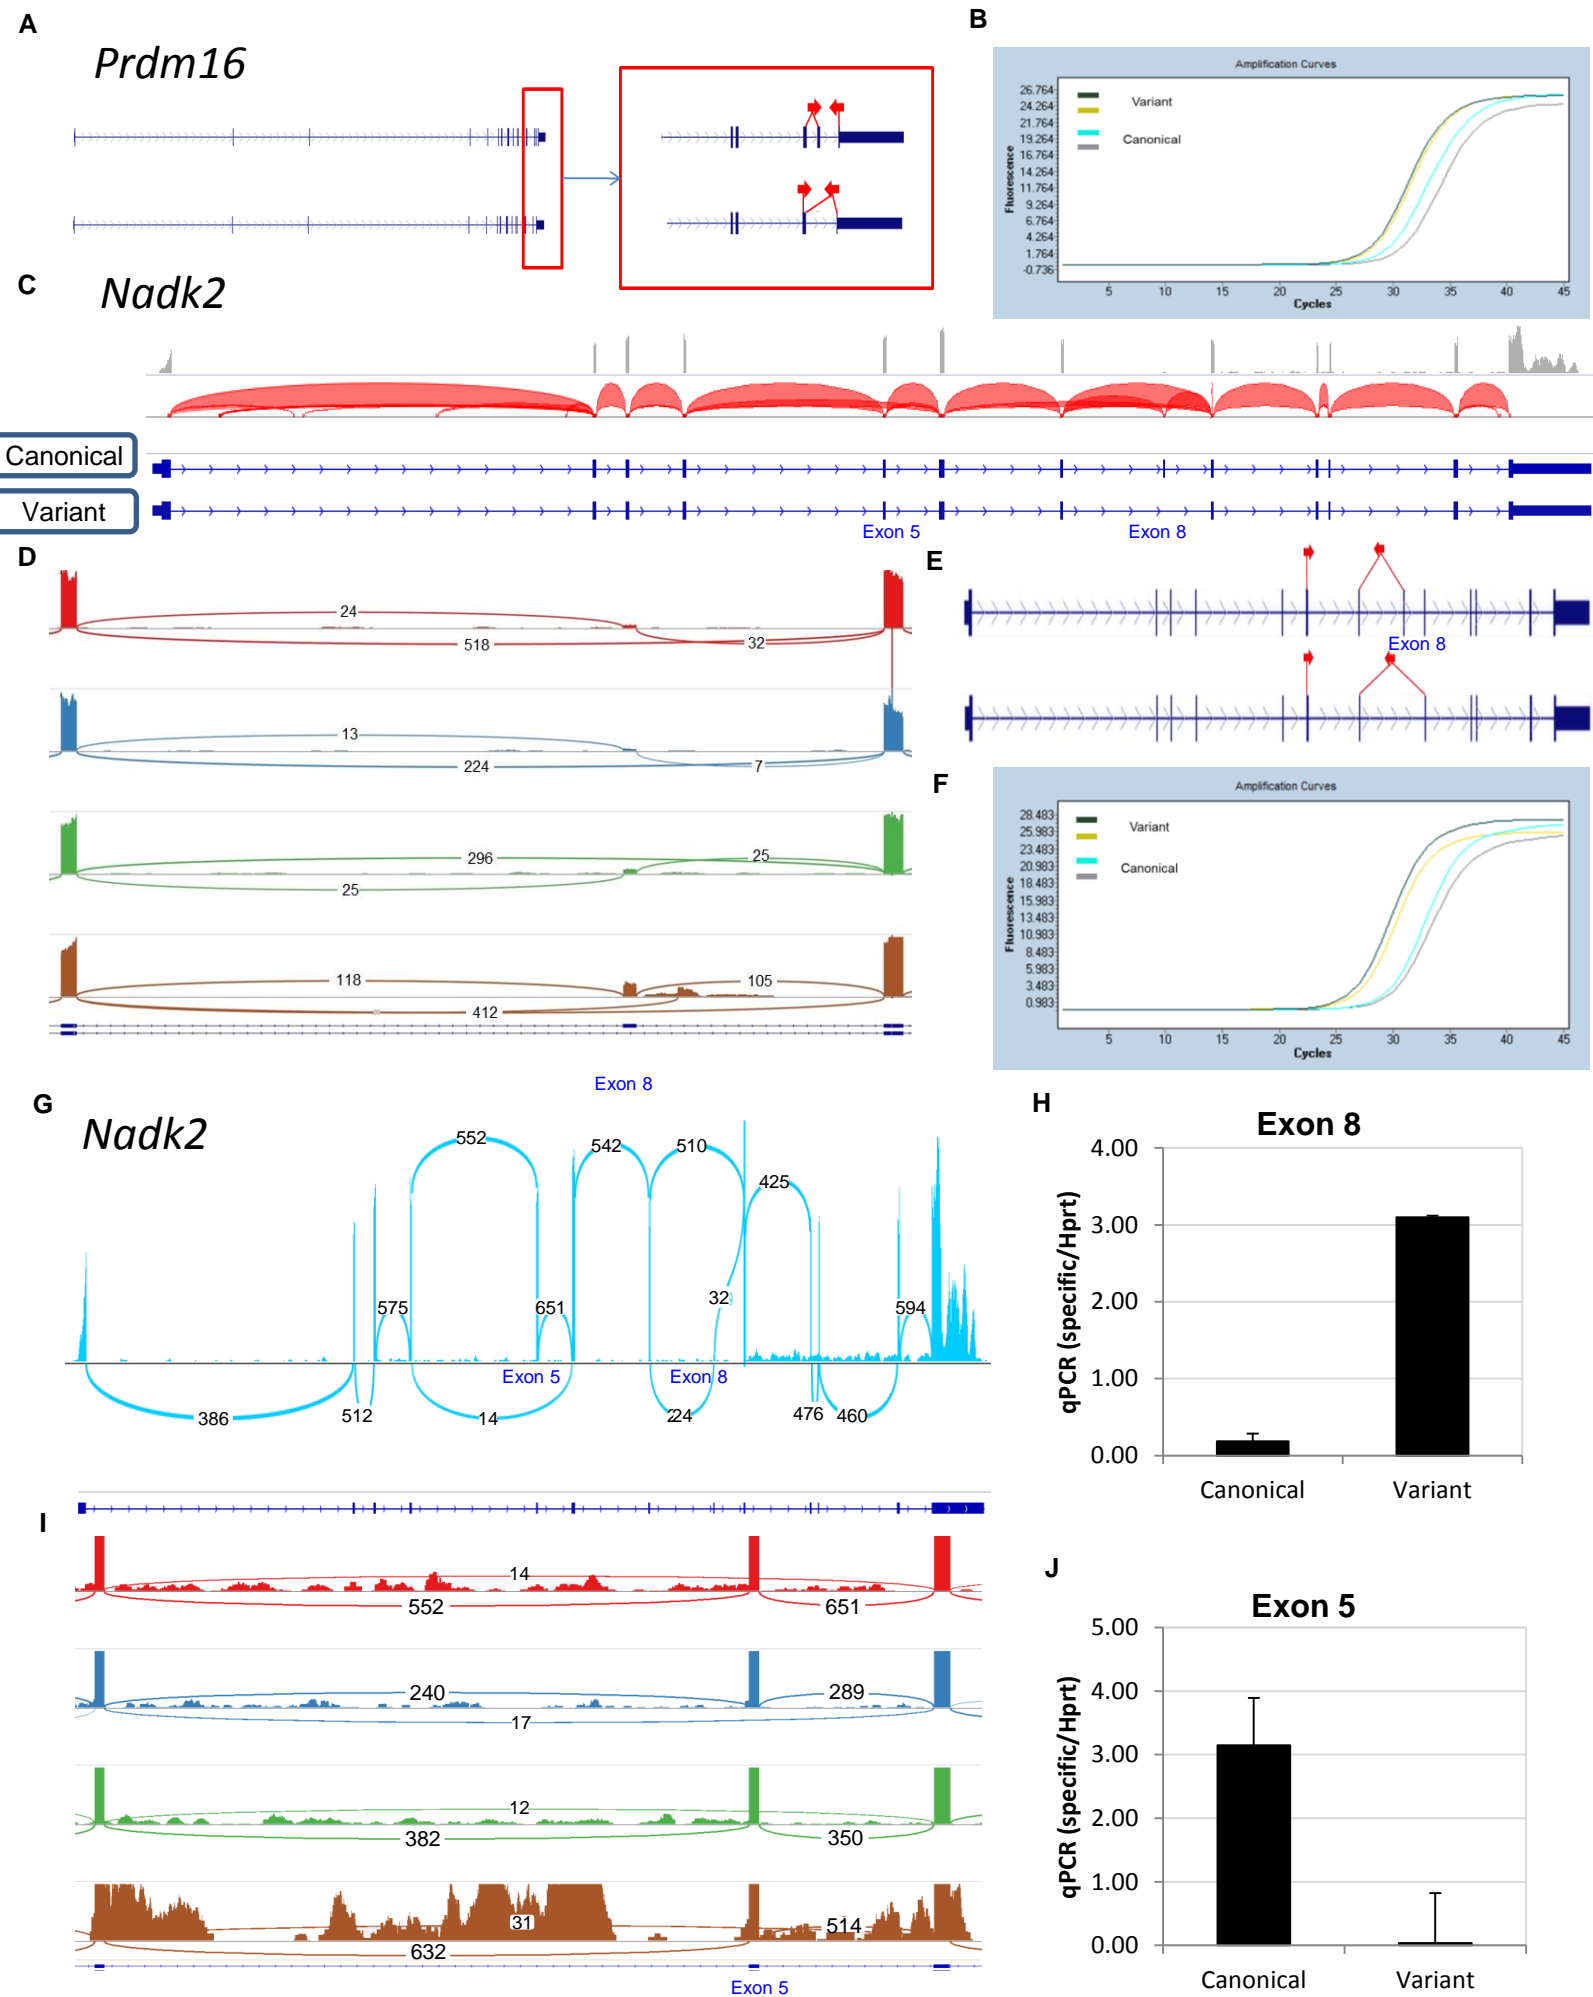

Supplementary Figure 5; related to figure 5

**A** *Cdkn1c*

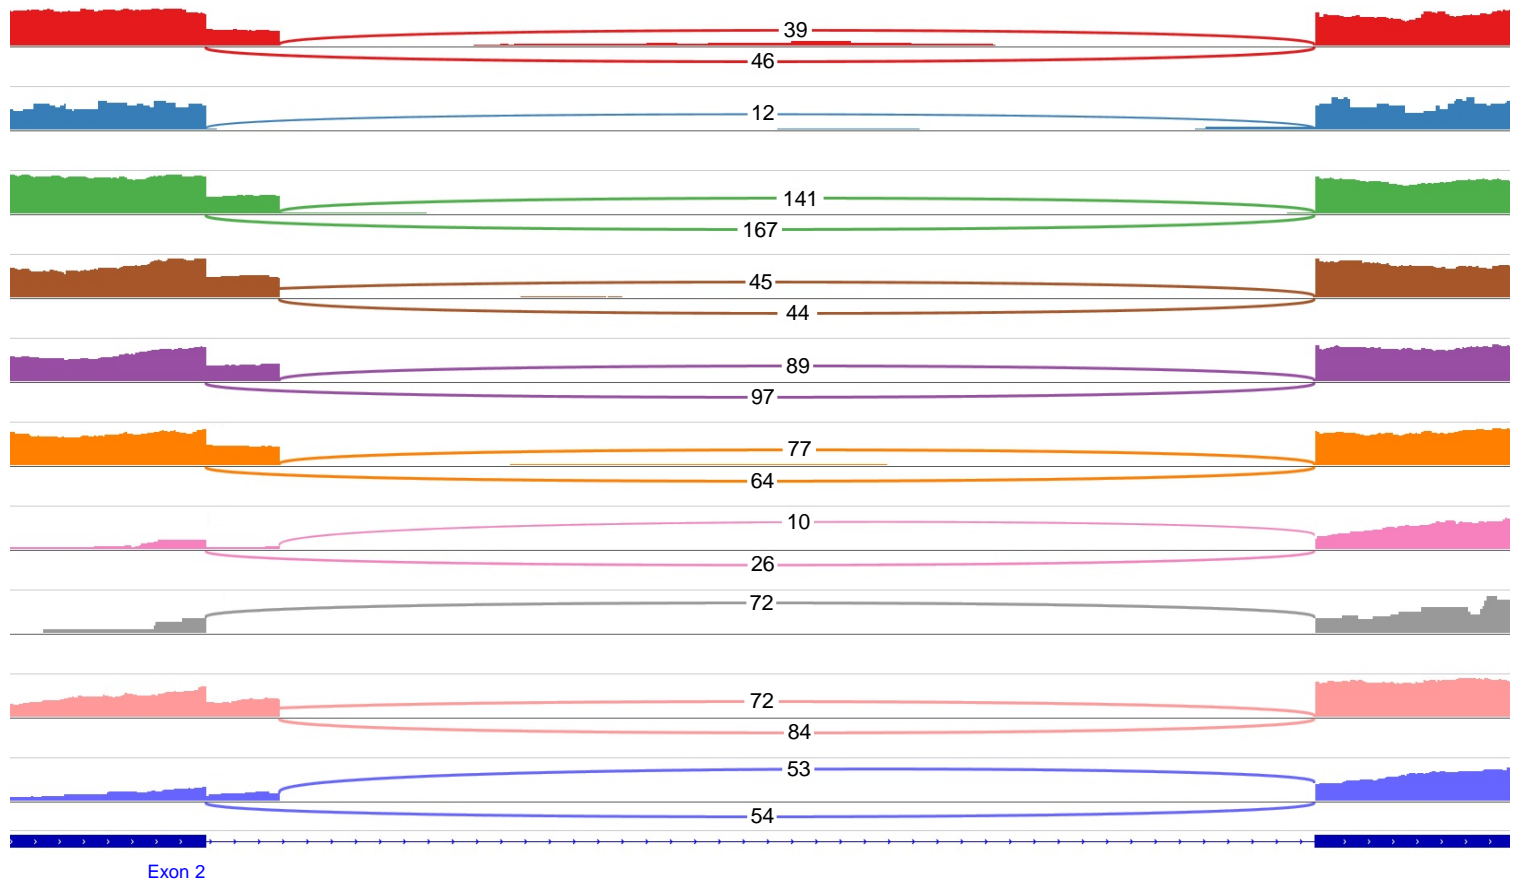

**B**

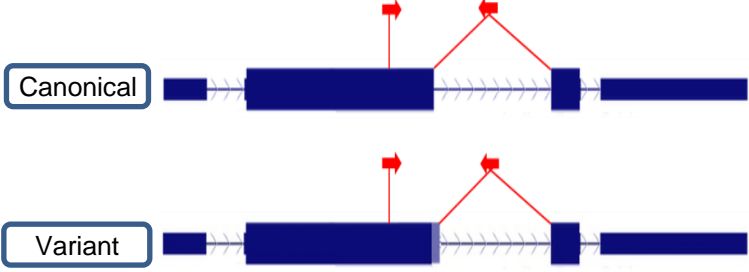

**C**

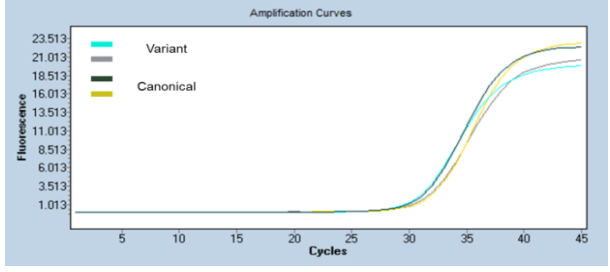

Supplementary Figure 6; related to figure 6

A

*Pbx1*

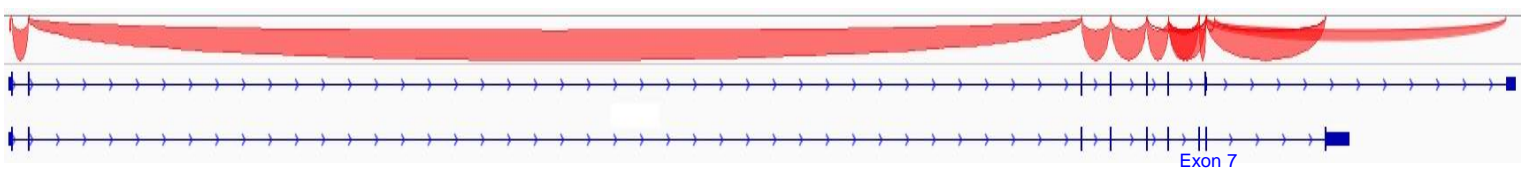

B

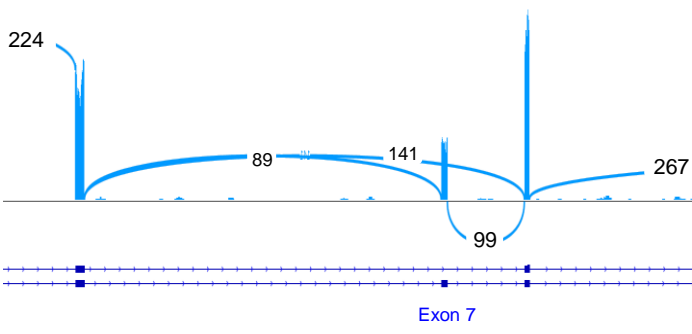

C

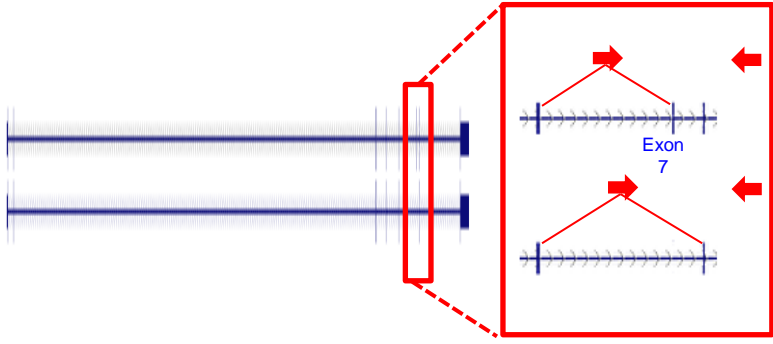

D

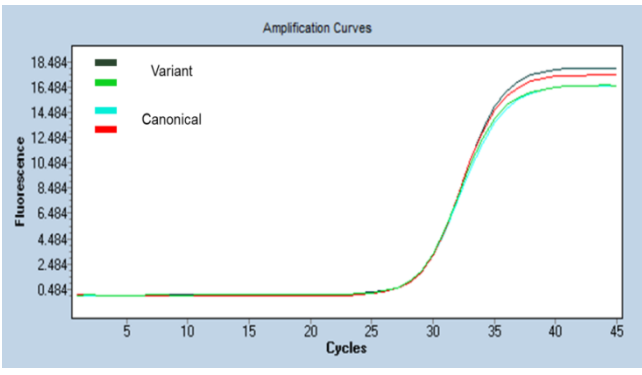

E

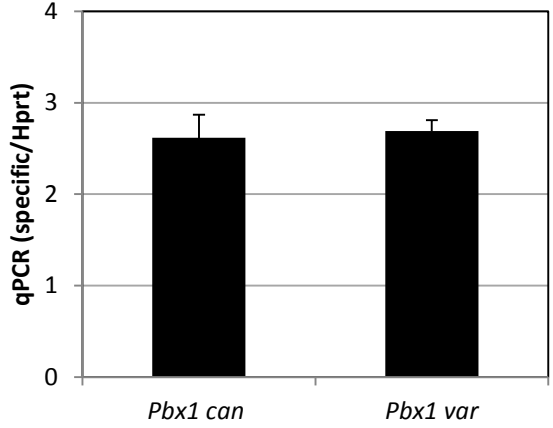

# Supplementary Table 1; related to figure 1

| Project     | Sample     | Short name | Markers                                          | Link to paper                                                                                                                                                 |
|-------------|------------|------------|--------------------------------------------------|---------------------------------------------------------------------------------------------------------------------------------------------------------------|
| Sun         | SRR892995* | B_1        | SP Lin- Sca1+ cKit+<br>CD150+                    | <a href="http://www.sciencedirect.com/science/article/pii/S1934590914000964">http://www.sciencedirect.com/science/article/pii/S1934590914000964</a>           |
|             | SRR892996  | A_1        |                                                  |                                                                                                                                                               |
|             | SRR892997  | B_2        |                                                  |                                                                                                                                                               |
|             | SRR892998* | A_2        |                                                  |                                                                                                                                                               |
| Cabezas     | ERR420375* | A_3        | Lin- Sca1+ cKit+<br>CD34- CD150+<br>CD135- CD48- | <a href="http://www.cell.com/cell-stem-cell/abstract/S1934-5909(14)00301-4">http://www.cell.com/cell-stem-cell/abstract/S1934-5909(14)00301-4</a>             |
|             | ERR420376  | B_3        |                                                  |                                                                                                                                                               |
|             | ERR420380  | A_4        |                                                  |                                                                                                                                                               |
|             | ERR420384* | B_4        |                                                  |                                                                                                                                                               |
| Qian        | ERR674987  | B_0        | Lin- Sca1+ cKit+ Flk2-                           | <a href="http://www.cell.com/cell-stem-cell/abstract/S1934-5909(15)00499-3">http://www.cell.com/cell-stem-cell/abstract/S1934-5909(15)00499-3</a>             |
| Venkatraman | ERR296708  | A_0        | Lin- Sca1+ cKit+<br>CD34- Flk2-                  | <a href="http://www.nature.com/nature/journal/vaop/ncurrent/abs/nature12303.html">http://www.nature.com/nature/journal/vaop/ncurrent/abs/nature12303.html</a> |



# Supplementary table 2; related to figures 3-6

## qPCR primers for RNA-seq prediction validation

| Gene                    | Sequence (5' to 3')                              |
|-------------------------|--------------------------------------------------|
| <i>HoxA9</i> canonical  | ccctgactgactatgcttgagg<br>cgagtggagcgagcatgtag   |
| <i>HoxA9</i> variant    | ctgggttttgtaggggca<br>ccggacggcagttgatagag       |
| <i>Meis1</i> canonical  | agcagtgagcaaggtgatgg<br>ttgtccaactgcttttctg      |
| <i>Meis1</i> variant    | gcagtgagcaagcaccctta<br>tgggctgcactattcttctcc    |
| <i>Prdm16</i> canonical | gaccatacccggagggtgtg<br>agagggacagcatcattgcat    |
| <i>Prdm16</i> variant   | attgcatatgcctccgggta<br>gaggaggaagaggaggagctg    |
| <i>Nadk2</i> canonical  | tcatagtaggaagccagtccctt<br>cacagccgagcctttaacatc |
| <i>Nadk2</i> variant    | agtaggaagccctggatgacag<br>cacagccgagcctttaacatc  |
| <i>Cdkn1c</i> canonical | gcttggcgaagaagtcggtc<br>tcgaggagcaggacgagaat     |
| <i>Cdkn1c</i> variant   | gcttggcgaagaagtcggag<br>tcgaggagcaggacgagaat     |
| <i>Pbx1</i> canonical   | aactcagcgggttctccagt<br>ctgtatcctctgtctggctga    |
| <i>Pbx1</i> variant     | gccttctgtaggggaggtcac<br>ccaactcagcgggtggatac    |

## UCSC alternative splicing track user guide

Goldstein Oron et al., 2016

1. Click the link to the track of choice ( [HSC splice junctions](#) )
2. Enter your gene of interest name (note-some genes have multiple names, if not found in UCSC browser might try NCBI-Gene and use the official gene symbol):

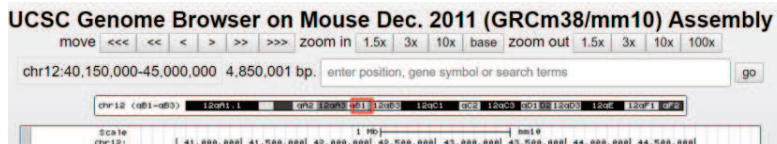

3. Scroll down until you reach the custom tracks panel:

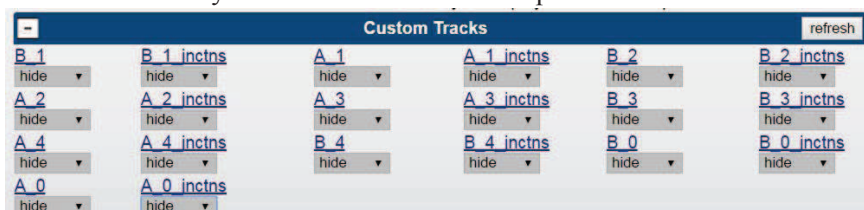

4. Choose the sample(s) you wish to view, and change their setting according to your interest (reads and/or splice junctions)

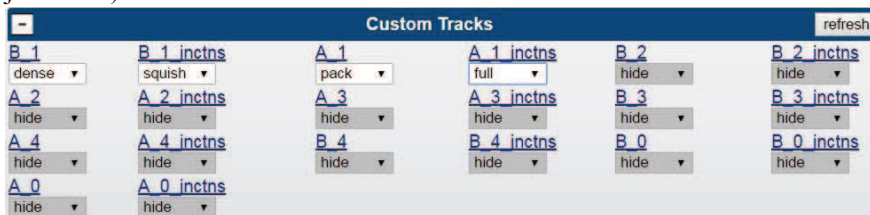

5. Splice junctions are now displayed and quantified (the number to the right of the lower dash, e.g. JUNC00169988 has 47 counts)

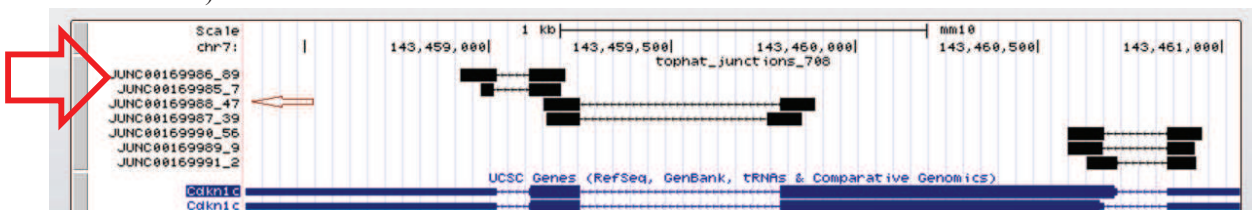

6. Good luck!

Notes:

The junction number represents all the RNA-seq reads that continued from one exon to another and are assembled from aligned reads of both strands.

If you also wish to see exactly how many reads originated from which strand, return to step 4 and mark full on the left most column, then click refresh and all the individual reads will be available.
